# Supplementary material for: MicroRNA regulation of murine trophoblast stem cell self-renewal and differentiation
Source: PubMed Central journal article supplement (PMC7494815; doi:10.26508/lsa.202000674), 2020-09-09

A.

Source data Figure 2

| Replicate 1        |       |         |       |         |             |                   |                               | Replicate 3 |       |         |       |         |             |                   |                               |
|--------------------|-------|---------|-------|---------|-------------|-------------------|-------------------------------|-------------|-------|---------|-------|---------|-------------|-------------------|-------------------------------|
|                    | p21   | Ct mean | Rpl7  | Ct mean | $\Delta$ Ct | $\Delta\Delta$ Ct | RQ ( $2^{-\Delta\Delta Ct}$ ) |             | p21   | Ct mean | Rpl7  | Ct mean | $\Delta$ Ct | $\Delta\Delta$ Ct | RQ ( $2^{-\Delta\Delta Ct}$ ) |
| Scrambled          | 22.27 | 22.31   | 14.4  | 14.49   | 7.82        | 0.00              | 1.00                          |             | 25.1  | 25.07   | 15.5  | 15.56   | 9.51        | 0.00              | 1.00                          |
|                    | 22.43 |         | 14.44 |         |             |                   |                               |             | 25.04 |         | 15.6  |         |             |                   |                               |
|                    | 22.24 |         | 14.64 |         |             |                   |                               |             | 25.07 |         | 15.57 |         |             |                   |                               |
| miR-291b mimic     | 22.55 | 22.49   | 14.43 | 14.49   | 8.00        | 0.18              | 0.88                          |             | 25.12 | 25.50   | 15.78 | 15.71   | 9.78        | 0.27              | 0.83                          |
|                    | 22.55 |         | 14.46 |         |             |                   |                               |             | 25.78 |         | 15.67 |         |             |                   |                               |
|                    | 22.38 |         | 14.58 |         |             |                   |                               |             | 25.59 |         | 15.69 |         |             |                   |                               |
| miR-291b inhibitor | 21.53 | 21.43   | 14.2  | 14.35   | 7.08        | -0.74             | 1.67                          |             | 24.2  | 24.41   | 15.93 | 15.79   | 8.61        | -0.90             | 1.87                          |
|                    | 21.41 |         | 14.49 |         |             |                   |                               |             | 24.65 |         | 15.67 |         |             |                   |                               |
|                    | 21.34 |         | 14.35 |         |             |                   |                               |             | 24.37 |         | 15.78 |         |             |                   |                               |
| miR-292a mimic     | 22.93 | 22.60   | 14.42 | 14.35   | 8.25        | 0.43              | 0.74                          |             | 25.47 | 25.40   | 15.77 | 15.70   | 9.69        | 0.18              | 0.88                          |
|                    | 22.76 |         | 14.31 |         |             |                   |                               |             | 25.35 |         | 15.71 |         |             |                   |                               |
|                    | 22.12 |         | 14.32 |         |             |                   |                               |             | 25.37 |         | 15.63 |         |             |                   |                               |
| miR-292a inhibitor | 22.08 | 22.07   | 14.94 | 14.68   | 7.39        | -0.43             | 1.34                          |             | 24.83 | 24.48   | 15.92 | 15.93   | 8.55        | -0.96             | 1.95                          |
|                    | 22.03 |         | 14.76 |         |             |                   |                               |             | 23.82 |         | 15.99 |         |             |                   |                               |
|                    | 22.1  |         | 14.33 |         |             |                   |                               |             | 24.79 |         | 15.87 |         |             |                   |                               |
| miR-294 mimic      | 22.96 | 23.00   | 14.37 | 14.49   | 8.51        | 0.69              | 0.62                          |             | 26    | 26.11   | 15.68 | 15.61   | 10.50       | 0.99              | 0.50                          |
|                    | 23    |         | 14.59 |         |             |                   |                               |             | 25.99 |         | 15.53 |         |             |                   |                               |
|                    | 23.03 |         | 14.51 |         |             |                   |                               |             | 26.33 |         | 15.61 |         |             |                   |                               |
| miR-294 inhibitor  | 21.22 | 21.35   | 14.31 | 14.32   | 7.02        | -0.80             | 1.74                          |             | 24.17 | 24.23   | 15.44 | 15.60   | 8.63        | -0.89             | 1.85                          |
|                    | 21.37 |         | 14.38 |         |             |                   |                               |             | 24.16 |         | 15.79 |         |             |                   |                               |
|                    | 21.45 |         | 14.28 |         |             |                   |                               |             | 24.35 |         | 15.57 |         |             |                   |                               |
| miR-295 mimic      | 23.5  | 23.30   | 14.05 | 14.00   | 9.31        | 1.49              | 0.36                          |             | 25.88 | 26.04   | 15.84 | 15.84   | 10.20       | 0.68              | 0.62                          |
|                    | 23.45 |         | 13.87 |         |             |                   |                               |             | 26.05 |         | 15.87 |         |             |                   |                               |
|                    | 22.96 |         | 14.07 |         |             |                   |                               |             | 26.19 |         | 15.82 |         |             |                   |                               |
| miR-295 inhibitor  | 21.55 | 21.56   | 14.4  | 14.69   | 6.87        | -0.95             | 1.93                          |             | 24.09 | 24.06   | 15.78 | 15.89   | 8.17        | -1.35             | 2.54                          |
|                    | 21.62 |         | 14.71 |         |             |                   |                               |             | 24.22 |         | 15.98 |         |             |                   |                               |
|                    | 21.5  |         | 14.95 |         |             |                   |                               |             | 23.87 |         | 15.92 |         |             |                   |                               |

  

| Replicate 2        |       |         |       |         |             |                   |                               |
|--------------------|-------|---------|-------|---------|-------------|-------------------|-------------------------------|
|                    | p21   | Ct mean | Rpl7  | Ct mean | $\Delta$ Ct | $\Delta\Delta$ Ct | RQ ( $2^{-\Delta\Delta Ct}$ ) |
| Scrambled          | 25.49 | 25.50   | 15.28 | 15.29   | 10.21       | 0.00              | 1.00                          |
|                    | 25.44 |         | 15.37 |         |             |                   |                               |
|                    | 25.57 |         | 15.22 |         |             |                   |                               |
| miR-291b mimic     | 25.93 | 26.11   | 15.41 | 15.28   | 10.83       | 0.62              | 0.65                          |
|                    | 26.13 |         | 15.22 |         |             |                   |                               |
|                    | 26.27 |         | 15.2  |         |             |                   |                               |
| miR-291b inhibitor | 24.93 | 24.90   | 15.21 | 15.29   | 9.61        | -0.60             | 1.51                          |
|                    | 24.78 |         | 15.45 |         |             |                   |                               |
|                    | 25    |         | 15.21 |         |             |                   |                               |
| miR-292a mimic     | 25.86 | 25.82   | 14.98 | 14.93   | 10.89       | 0.68              | 0.63                          |
|                    | 25.76 |         | 14.92 |         |             |                   |                               |
|                    | 25.83 |         | 14.89 |         |             |                   |                               |
| miR-292a inhibitor | 24.98 | 25.11   | 15.32 | 15.39   | 9.72        | -0.49             | 1.40                          |
|                    | 25.65 |         | 15.43 |         |             |                   |                               |
|                    | 24.7  |         | 15.42 |         |             |                   |                               |
| miR-294 mimic      | 26.21 | 26.10   | 15.65 | 15.63   | 10.47       | 0.26              | 0.84                          |
|                    | 25.93 |         | 15.62 |         |             |                   |                               |
|                    | 26.15 |         | 15.61 |         |             |                   |                               |
| miR-294 inhibitor  | 24.83 | 24.46   | 15.44 | 15.50   | 8.96        | -1.25             | 2.37                          |
|                    | 24.92 |         | 15.47 |         |             |                   |                               |
|                    | 23.64 |         | 15.59 |         |             |                   |                               |
| miR-295 mimic      | 25.99 | 25.94   | 15.29 | 15.30   | 10.64       | 0.43              | 0.74                          |
|                    | 25.72 |         | 15.34 |         |             |                   |                               |
|                    | 26.1  |         | 15.27 |         |             |                   |                               |
| miR-295 inhibitor  | 24.91 | 25.32   | 16.37 | 16.40   | 8.92        | -1.29             | 2.45                          |
|                    | 25.46 |         | 16.36 |         |             |                   |                               |
|                    | 25.58 |         | 16.46 |         |             |                   |                               |

  

| Replicate 1       |       |         |       |         |             |                   |                               |
|-------------------|-------|---------|-------|---------|-------------|-------------------|-------------------------------|
|                   | p27   | Ct mean | Rpl7  | Ct mean | $\Delta$ Ct | $\Delta\Delta$ Ct | RQ ( $2^{-\Delta\Delta Ct}$ ) |
| Scrambled         | 25.85 | 25.85   | 12.35 | 12.34   | 13.51       | 0.00              | 1.00                          |
|                   | 25.78 |         | 12.27 |         |             |                   |                               |
|                   | 25.93 |         | 12.41 |         |             |                   |                               |
| miR-294 mimic     | 26.17 | 26.24   | 12.68 | 12.47   | 13.78       | 0.27              | 0.83                          |
|                   | 26.25 |         | 12.41 |         |             |                   |                               |
|                   | 26.31 |         | 12.31 |         |             |                   |                               |
| miR-294 inhibitor | 25.53 | 25.59   | 13.11 | 12.85   | 12.74       | -0.77             | 1.70                          |
|                   | 25.92 |         | 12.71 |         |             |                   |                               |
|                   | 25.32 |         | 12.72 |         |             |                   |                               |
| miR-295 mimic     | 26.26 | 26.37   | 12.7  | 12.71   | 13.66       | 0.15              | 0.90                          |
|                   | 26.36 |         | 12.62 |         |             |                   |                               |
|                   | 26.49 |         | 12.82 |         |             |                   |                               |
| miR-295 inhibitor | 24.76 | 25.03   | 12.23 | 12.27   | 12.77       | -0.74             | 1.67                          |
|                   | 24.95 |         | 12.03 |         |             |                   |                               |
|                   | 25.39 |         | 12.54 |         |             |                   |                               |

  

| Replicate 2       |       |         |       |         |             |                   |                               |
|-------------------|-------|---------|-------|---------|-------------|-------------------|-------------------------------|
|                   | p27   | Ct mean | Rpl7  | Ct mean | $\Delta$ Ct | $\Delta\Delta$ Ct | RQ ( $2^{-\Delta\Delta Ct}$ ) |
| Scrambled         | 27.42 | 27.38   | 15.38 | 15.41   | 11.97       | 0.00              | 1.00                          |
|                   | 27.34 |         | 15.42 |         |             |                   |                               |
|                   | 27.38 |         | 15.44 |         |             |                   |                               |
| miR-294 mimic     | 27.42 | 28.03   | 15.43 | 15.41   | 12.62       | 0.65              | 0.64                          |
|                   | 28.33 |         | 15.47 |         |             |                   |                               |
|                   | 28.33 |         | 15.32 |         |             |                   |                               |
| miR-294 inhibitor | 26.52 | 26.59   | 15.3  | 15.24   | 11.35       | -0.62             | 1.53                          |
|                   | 26.59 |         | 15.21 |         |             |                   |                               |
|                   | 26.67 |         | 15.22 |         |             |                   |                               |
| miR-295 mimic     | 28.12 | 28.30   | 15.58 | 15.55   | 12.75       | 0.78              | 0.58                          |
|                   | 28.53 |         | 15.61 |         |             |                   |                               |
|                   | 28.24 |         | 15.46 |         |             |                   |                               |
| miR-295 inhibitor | 26.99 | 27.16   | 15.77 | 15.70   | 11.46       | -0.51             | 1.42                          |
|                   | 27.36 |         | 15.53 |         |             |                   |                               |
|                   | 27.12 |         | 15.79 |         |             |                   |                               |

  

| Replicate 3       |       |         |       |         |             |                   |                               |
|-------------------|-------|---------|-------|---------|-------------|-------------------|-------------------------------|
|                   | p27   | Ct mean | Rpl7  | Ct mean | $\Delta$ Ct | $\Delta\Delta$ Ct | RQ ( $2^{-\Delta\Delta Ct}$ ) |
| Scrambled         | 27.1  | 26.97   | 14.98 | 14.98   | 11.99       | 0.00              | 1.00                          |
|                   | 26.88 |         | 14.91 |         |             |                   |                               |
|                   | 26.92 |         | 15.04 |         |             |                   |                               |
| miR-294 mimic     | 27.96 | 27.89   | 15.32 | 15.19   | 12.71       | 0.72              | 0.61                          |
|                   | 27.83 |         | 15.01 |         |             |                   |                               |
|                   | 27.89 |         | 15.23 |         |             |                   |                               |
| miR-294 inhibitor | 26.64 | 26.75   | 15.37 | 15.30   | 11.45       | -0.54             | 1.46                          |
|                   | 26.88 |         | 15.39 |         |             |                   |                               |
|                   | 26.73 |         | 15.15 |         |             |                   |                               |
| miR-295 mimic     | 28.03 | 28.40   | 15.72 | 15.72   | 12.68       | 0.69              | 0.62                          |
|                   | 28.34 |         | 15.76 |         |             |                   |                               |
|                   | 28.82 |         | 15.68 |         |             |                   |                               |
| miR-295 inhibitor | 27.83 | 27.24   | 15.78 | 15.75   | 11.49       | -0.50             | 1.42                          |
|                   | 26.92 |         | 15.73 |         |             |                   |                               |
|                   | 26.97 |         | 15.75 |         |             |                   |                               |

A. (Cont...)

Source data Figure 2

| Replicate 1        |                         |         |                         |         |       |       |                          |
|--------------------|-------------------------|---------|-------------------------|---------|-------|-------|--------------------------|
|                    | Wet1                    | Ct mean | Rp17                    | Ct mean | ΔCt   | ΔΔCt  | RQ (2 <sup>-ΔΔCt</sup> ) |
| Scrambled          | 22.34<br>22.29<br>22.42 | 22.35   | 18.35<br>18.26<br>18.42 | 16.34   | 6.01  | 0.00  | <b>1.00</b>              |
| miR-291b mimic     | 22.59<br>22.69<br>22.8  | 22.69   | 18.76<br>18.28<br>18.52 | 13.80   | 8.89  | 0.89  | <b>0.54</b>              |
| miR-291b inhibitor | 20.5<br>20.5<br>20.41   | 20.47   | 18.28<br>18.39<br>18.52 | 16.40   | 4.07  | -1.93 | <b>3.82</b>              |
| miR-294 mimic      | 21.25<br>21.29<br>21.47 | 21.34   | 18.96<br>18.98<br>17.93 | 17.29   | 6.05  | 0.04  | <b>0.67</b>              |
| miR-294 inhibitor  | 21.85<br>20.96          | 21      | 18.46<br>18.27<br>18.39 | 16.37   | 4.83  | -1.38 | <b>2.60</b>              |
| miR-295 mimic      | 21.53<br>22.31<br>22.88 | 22.64   | 18.25<br>18.41<br>18.47 | 16.38   | 6.26  | 0.25  | <b>0.84</b>              |
| miR-295 inhibitor  | 20.89<br>20.83<br>20.92 | 20.88   | 16.2<br>16.27<br>16.3   | 16.32   | 4.56  | -1.43 | <b>2.71</b>              |
| Replicate 2        |                         |         |                         |         |       |       |                          |
|                    | Wet1                    | Ct mean | Rp17                    | Ct mean | ΔCt   | ΔΔCt  | RQ (2 <sup>-ΔΔCt</sup> ) |
| Scrambled          | 21.89<br>22.21<br>22.07 | 22.06   | 18.88<br>18.72<br>18.54 | 15.71   | 6.34  | 0.00  | <b>1.00</b>              |
| miR-291b mimic     | 22.75<br>22.59<br>21.24 | 22.19   | 18.43<br>18.69<br>18.56 | 15.56   | 6.63  | 0.29  | <b>0.82</b>              |
| miR-291b inhibitor | 20.18<br>20.77<br>20.23 | 20.39   | 18.87<br>18.83<br>18.81 | 15.84   | 4.56  | -1.79 | <b>1.45</b>              |
| miR-294 mimic      | 22.21<br>22.3<br>22.11  | 22.27   | 18.22<br>18.31<br>18.51 | 15.35   | 6.93  | 0.58  | <b>0.67</b>              |
| miR-294 inhibitor  | 20.72<br>20.22<br>21.41 | 20.78   | 18.77<br>18.68<br>18.69 | 15.70   | 5.09  | -1.26 | <b>2.39</b>              |
| miR-295 mimic      | 21.94<br>21.93<br>21.85 | 21.91   | 18.48<br>18.52<br>18.46 | 15.49   | 6.42  | 0.08  | <b>0.95</b>              |
| miR-295 inhibitor  | 20.43<br>20.63<br>20.84 | 20.69   | 18.86<br>18.79<br>18.82 | 15.82   | 4.81  | -1.53 | <b>2.89</b>              |
| Replicate 3        |                         |         |                         |         |       |       |                          |
|                    | Wet1                    | Ct mean | Rp17                    | Ct mean | ΔCt   | ΔΔCt  | RQ (2 <sup>-ΔΔCt</sup> ) |
| Scrambled          | 27.1<br>26.88<br>26.92  | 26.97   | 18.21<br>18.35<br>18.24 | 15.27   | 11.70 | 0.00  | <b>1.00</b>              |
| miR-291b mimic     | 27<br>27.04<br>27.21    | 27.08   | 18.21<br>18.28<br>18.32 | 15.27   | 11.81 | 0.11  | <b>0.82</b>              |
| miR-291b inhibitor | 25.13<br>25.22<br>25.3  | 25.22   | 18.67<br>18.62<br>18.59 | 15.63   | 9.59  | -2.11 | <b>4.12</b>              |
| miR-294 mimic      | 27.23<br>27.92<br>27.68 | 27.61   | 18.73<br>18.71<br>18.78 | 15.74   | 11.87 | 0.17  | <b>0.89</b>              |
| miR-294 inhibitor  | 25.77<br>25.76<br>25.21 | 25.41   | 18.55<br>18.38<br>18.27 | 15.40   | 10.01 | -1.69 | <b>3.22</b>              |
| miR-295 mimic      | 26.9<br>26.92<br>27.83  | 27.22   | 18.21<br>18.47<br>18.36 | 15.38   | 11.84 | 0.14  | <b>0.91</b>              |
| miR-295 inhibitor  | 25.76<br>25.34<br>25.83 | 25.64   | 18.22<br>18.19<br>18.28 | 15.23   | 10.41 | -1.29 | <b>2.44</b>              |

| Replicate 1        |                         |         |                         |         |       |       |                          |
|--------------------|-------------------------|---------|-------------------------|---------|-------|-------|--------------------------|
|                    | Rp17                    | Ct mean | Rp17                    | Ct mean | ΔCt   | ΔΔCt  | RQ (2 <sup>-ΔΔCt</sup> ) |
| Scrambled          | 27.44<br>27.47<br>27.92 | 27.61   | 18.97<br>18.94<br>18.95 | 15.55   | 11.66 | 0.00  | <b>1.00</b>              |
| miR-291b mimic     | 28.76<br>28.82<br>28.93 | 28.84   | 18.77<br>18.03<br>18.91 | 15.50   | 12.93 | 1.28  | <b>0.41</b>              |
| miR-291b inhibitor | 25.87<br>25.91<br>25.82 | 25.87   | 18.84<br>18.9<br>18.97  | 15.50   | 9.96  | -1.69 | <b>3.23</b>              |
| Replicate 2        |                         |         |                         |         |       |       |                          |
|                    | Rp17                    | Ct mean | Rp17                    | Ct mean | ΔCt   | ΔΔCt  | RQ (2 <sup>-ΔΔCt</sup> ) |
| Scrambled          | 25.49<br>25.44<br>25.57 | 25.50   | 16.23<br>16.17<br>16.03 | 16.14   | 9.36  | 0.00  | <b>1.00</b>              |
| miR-291b mimic     | 26.22<br>26.15<br>26.29 | 26.22   | 18.98<br>16.02<br>16.1  | 16.03   | 10.19 | 0.83  | <b>0.56</b>              |
| miR-291b inhibitor | 23.2<br>23.03<br>23.91  | 23.68   | 16.31<br>16.25<br>16.16 | 16.24   | 7.44  | -1.92 | <b>3.78</b>              |

| Replicate 1        |                         |         |                         |         |       |       |                          |
|--------------------|-------------------------|---------|-------------------------|---------|-------|-------|--------------------------|
|                    | Rp17                    | Ct mean | Rp17                    | Ct mean | ΔCt   | ΔΔCt  | RQ (2 <sup>-ΔΔCt</sup> ) |
| Scrambled          | 25.39<br>25.45<br>25.27 | 25.37   | 18.76<br>18.63<br>18.77 | 15.63   | 9.74  | 0.00  | <b>1.00</b>              |
| miR-291b mimic     | 25.88<br>25.83<br>25.69 | 25.67   | 18.7<br>18.56<br>18.7   | 15.66   | 10.01 | 0.27  | <b>0.83</b>              |
| miR-291b inhibitor | 23.12<br>23.16<br>22.91 | 23.06   | 18.59<br>18.5<br>18.59  | 15.58   | 7.50  | -2.24 | <b>4.71</b>              |
| miR-294 mimic      | 25.73<br>25.76<br>25.93 | 25.80   | 18.49<br>18.45<br>18.49 | 15.48   | 10.31 | 0.59  | <b>0.67</b>              |
| miR-294 inhibitor  | 22.87<br>23.93<br>22.83 | 23.11   | 18.52<br>18.94<br>18.52 | 15.66   | 7.45  | -2.29 | <b>4.89</b>              |
| miR-295 mimic      | 25.89<br>25.93<br>26.13 | 25.98   | 18.59<br>18.48<br>18.61 | 15.55   | 10.43 | 0.69  | <b>0.62</b>              |
| miR-295 inhibitor  | 23.17<br>23.13<br>23.89 | 23.23   | 18.44<br>18.69<br>18.45 | 15.53   | 7.70  | -2.04 | <b>4.19</b>              |
| Replicate 2        |                         |         |                         |         |       |       |                          |
|                    | Rp17                    | Ct mean | Rp17                    | Ct mean | ΔCt   | ΔΔCt  | RQ (2 <sup>-ΔΔCt</sup> ) |
| Scrambled          | 26.26<br>26.21<br>26.37 | 26.28   | 18.11<br>18.09<br>18.24 | 15.11   | 11.13 | 0.00  | <b>1.00</b>              |
| miR-291b mimic     | 26.53<br>27.68<br>26.76 | 26.77   | 18.58<br>18.57<br>18.49 | 15.55   | 11.23 | 0.69  | <b>0.94</b>              |
| miR-291b inhibitor | 24.98<br>25.21<br>25.67 | 25.09   | 18.82<br>18.91<br>18.81 | 15.83   | 9.24  | -1.89 | <b>3.71</b>              |
| miR-294 mimic      | 26.73<br>26.81<br>26.89 | 26.81   | 14.97<br>18.02<br>18.21 | 15.07   | 11.74 | 0.61  | <b>0.66</b>              |
| miR-294 inhibitor  | 24<br>25.11<br>24.76    | 24.66   | 18.69<br>18.78<br>18.75 | 15.72   | 8.93  | -2.20 | <b>4.59</b>              |
| miR-295 mimic      | 27.59<br>27.95<br>27.77 | 27.77   | 18.5<br>18.48<br>18.44  | 15.47   | 12.30 | 1.16  | <b>0.46</b>              |
| miR-295 inhibitor  | 24.63<br>24.57<br>24.11 | 24.44   | 18.78<br>18.54<br>18.88 | 15.72   | 8.72  | -2.42 | <b>5.34</b>              |
| Replicate 3        |                         |         |                         |         |       |       |                          |
|                    | Rp17                    | Ct mean | Rp17                    | Ct mean | ΔCt   | ΔΔCt  | RQ (2 <sup>-ΔΔCt</sup> ) |
| Scrambled          | 27.1<br>26.88<br>26.92  | 26.97   | 14.95<br>14.83<br>14.91 | 14.90   | 12.07 | 0.00  | <b>1.00</b>              |
| miR-291b mimic     | 28.15<br>27.84<br>27.81 | 27.97   | 18.41<br>18.52<br>18.64 | 15.42   | 12.44 | 0.37  | <b>0.77</b>              |
| miR-291b inhibitor | 24.73<br>24.52<br>25.31 | 24.85   | 14.86<br>15.01<br>14.92 | 14.96   | 9.89  | -2.18 | <b>4.53</b>              |
| miR-294 mimic      | 27.94<br>28.64<br>27.92 | 28.17   | 18.92<br>18.18<br>18.88 | 15.99   | 12.17 | 0.10  | <b>0.93</b>              |
| miR-294 inhibitor  | 24.69<br>24.73<br>25.35 | 24.92   | 18.21<br>18.37<br>18.26 | 15.28   | 9.64  | -2.43 | <b>5.38</b>              |
| miR-295 mimic      | 29.76<br>29.49<br>28.68 | 29.31   | 18.63<br>14.92<br>18.37 | 15.31   | 14.00 | 1.93  | <b>0.26</b>              |
| miR-295 inhibitor  | 25.87<br>24.93<br>25.38 | 25.39   | 18.58<br>18.38<br>18.52 | 15.49   | 9.90  | -2.17 | <b>4.90</b>              |

B.

Source data Figure 2

For Figure 2B, P21 and RPL7

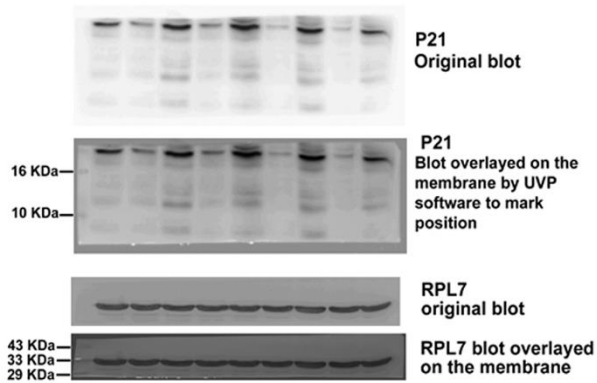

For Figure 2B, RBL2 and RPL7

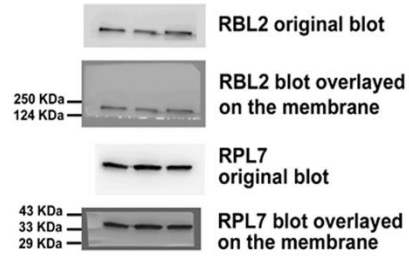

For Figure 2B, P27 and RPL7

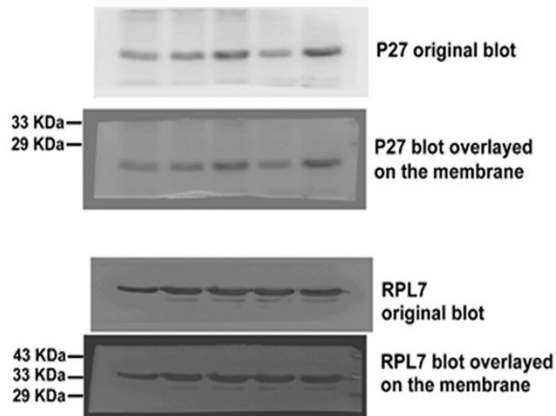

For Figure 2B, E2F7 and RPL7

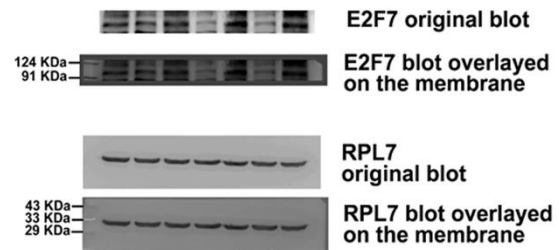

For Figure 2B, WEE1 and RPL7

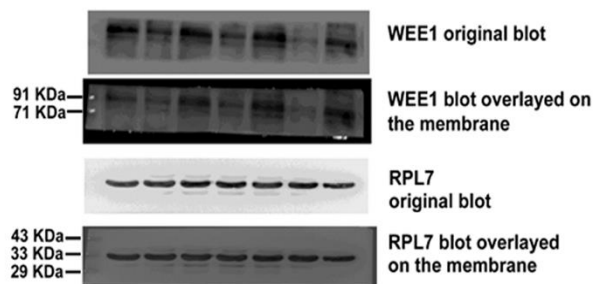

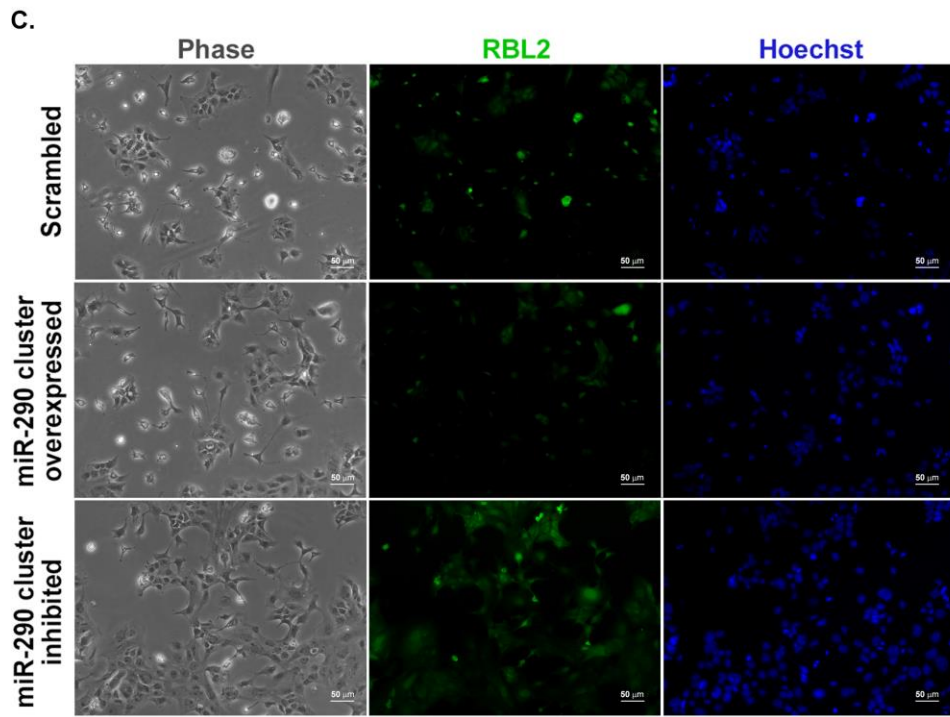

Supplement: LSA-2020-00674_SdataF2.pdf [file LSA-2020-00674_SdataF2.pdf]
