# Supplementary material for: MicroRNA regulation of murine trophoblast stem cell self-renewal and differentiation
Source: PubMed Central journal article supplement (PMC7494815; doi:10.26508/lsa.202000674), 2020-09-09

A.

Source data Figure 3

| Replicate 1       |           |         |       |         |             |                   |                               |
|-------------------|-----------|---------|-------|---------|-------------|-------------------|-------------------------------|
|                   | Cyclin D1 | Ct mean | Rpl7  | Ct mean | $\Delta$ Ct | $\Delta\Delta$ Ct | RQ ( $2^{-\Delta\Delta Ct}$ ) |
| Scrambled         | 19.87     | 20.07   | 13.39 | 13.15   | 6.92        | 0.00              | <b>1.00</b>                   |
|                   | 20.1      |         | 12.99 |         |             |                   |                               |
|                   | 20.24     |         | 13.08 |         |             |                   |                               |
| miR-322 mimic     | 23.11     | 23.24   | 13.14 | 13.31   | 9.93        | 3.01              | <b>0.12</b>                   |
|                   | 23.72     |         | 13.03 |         |             |                   |                               |
|                   | 22.9      |         | 13.77 |         |             |                   |                               |
| miR-322 inhibitor | 19.8      | 19.98   | 13.23 | 13.11   | 6.87        | -0.04             | <b>1.03</b>                   |
|                   | 20.21     |         | 13.15 |         |             |                   |                               |
|                   | 19.94     |         | 12.95 |         |             |                   |                               |
| miR-503 mimic     | 22.84     | 22.68   | 13.03 | 13.32   | 9.35        | 2.44              | <b>0.18</b>                   |
|                   | 22.67     |         | 13.37 |         |             |                   |                               |
|                   | 22.52     |         | 13.57 |         |             |                   |                               |
| miR-503 inhibitor | 19.88     | 19.88   | 13.35 | 13.46   | 6.42        | -0.49             | <b>1.41</b>                   |
|                   | 19.87     |         | 13.58 |         |             |                   |                               |
|                   | 19.89     |         | 13.44 |         |             |                   |                               |
| Replicate 2       |           |         |       |         |             |                   |                               |
|                   | Cyclin D1 | Ct mean | Rpl7  | Ct mean | $\Delta$ Ct | $\Delta\Delta$ Ct | RQ ( $2^{-\Delta\Delta Ct}$ ) |
| Scrambled         | 20.68     | 20.54   | 15.88 | 15.78   | 4.76        | 0.00              | <b>1.00</b>                   |
|                   | 20.52     |         | 15.78 |         |             |                   |                               |
|                   | 20.42     |         | 15.67 |         |             |                   |                               |
| miR-322 mimic     | 22.12     | 22.42   | 15.17 | 15.47   | 6.95        | 2.19              | <b>0.22</b>                   |
|                   | 22.79     |         | 15.62 |         |             |                   |                               |
|                   | 22.35     |         | 15.61 |         |             |                   |                               |
| miR-322 inhibitor | 19.63     | 19.75   | 15.2  | 14.94   | 4.81        | 0.05              | <b>0.97</b>                   |
|                   | 19.75     |         | 14.73 |         |             |                   |                               |
|                   | 19.88     |         | 14.89 |         |             |                   |                               |
| miR-503 mimic     | 22.92     | 22.76   | 15.72 | 15.77   | 6.98        | 2.22              | <b>0.21</b>                   |
|                   | 22.76     |         | 15.77 |         |             |                   |                               |
|                   | 22.59     |         | 15.83 |         |             |                   |                               |
| miR-503 inhibitor | 20.06     | 19.89   | 15.35 | 15.48   | 4.42        | -0.35             | <b>1.27</b>                   |
|                   | 20.14     |         | 15.75 |         |             |                   |                               |
|                   | 19.48     |         | 15.33 |         |             |                   |                               |
| Replicate 3       |           |         |       |         |             |                   |                               |
|                   | Cyclin D1 | Ct mean | Rpl7  | Ct mean | $\Delta$ Ct | $\Delta\Delta$ Ct | RQ ( $2^{-\Delta\Delta Ct}$ ) |
| Scrambled         | 21.35     | 21.41   | 15.89 | 15.78   | 5.63        | 0.00              | <b>1.00</b>                   |
|                   | 21.42     |         | 15.72 |         |             |                   |                               |
|                   | 21.46     |         | 15.72 |         |             |                   |                               |
| miR-322 mimic     | 22.28     | 22.09   | 15.37 | 15.18   | 6.91        | 1.28              | <b>0.41</b>                   |
|                   | 22.07     |         | 14.98 |         |             |                   |                               |
|                   | 21.92     |         | 15.59 |         |             |                   |                               |
| miR-322 inhibitor | 20.94     | 20.25   | 14.98 | 14.97   | 5.28        | -0.35             | <b>1.28</b>                   |
|                   | 20.58     |         | 14.9  |         |             |                   |                               |
|                   | 19.23     |         | 15.03 |         |             |                   |                               |
| miR-503 mimic     | 23.01     | 23.14   | 15.79 | 15.29   | 7.85        | 2.21              | <b>0.22</b>                   |
|                   | 23.19     |         | 15.02 |         |             |                   |                               |
|                   | 23.22     |         | 15.07 |         |             |                   |                               |
| miR-503 inhibitor | 20.23     | 20.23   | 15.04 | 14.83   | 5.40        | -0.23             | <b>1.18</b>                   |
|                   | 20.18     |         | 15.18 |         |             |                   |                               |
|                   | 20.28     |         | 14.27 |         |             |                   |                               |

| Replicate 1       |           |         |       |         |             |                   |                               |
|-------------------|-----------|---------|-------|---------|-------------|-------------------|-------------------------------|
|                   | Cyclin E1 | Ct mean | Rpl7  | Ct mean | $\Delta$ Ct | $\Delta\Delta$ Ct | RQ ( $2^{-\Delta\Delta Ct}$ ) |
| Scrambled         | 20.1      | 20.21   | 14.11 | 14.74   | 5.47        | 0.00              | <b>1.00</b>                   |
|                   | 20.29     |         | 14.28 |         |             |                   |                               |
|                   | 20.25     |         | 15.84 |         |             |                   |                               |
| miR-322 mimic     | 20.47     | 20.42   | 14.05 | 14.41   | 6.02        | 0.55              | <b>0.68</b>                   |
|                   | 20.31     |         | 14.89 |         |             |                   |                               |
|                   | 20.49     |         | 14.28 |         |             |                   |                               |
| miR-322 inhibitor | 19.75     | 19.82   | 14.51 | 14.64   | 5.18        | -0.29             | <b>1.22</b>                   |
|                   | 19.83     |         | 14.49 |         |             |                   |                               |
|                   | 19.87     |         | 14.91 |         |             |                   |                               |
| miR-503 mimic     | 20.31     | 20.23   | 14.58 | 14.51   | 5.73        | 0.26              | <b>0.84</b>                   |
|                   | 20.23     |         | 14.5  |         |             |                   |                               |
|                   | 20.16     |         | 14.44 |         |             |                   |                               |
| miR-503 inhibitor | 20.25     | 19.85   | 14.55 | 14.62   | 5.23        | -0.24             | <b>1.18</b>                   |
|                   | 19.34     |         | 14.86 |         |             |                   |                               |
|                   | 19.87     |         | 14.46 |         |             |                   |                               |
| Replicate 2       |           |         |       |         |             |                   |                               |
|                   | Cyclin E1 | Ct mean | Rpl7  | Ct mean | $\Delta$ Ct | $\Delta\Delta$ Ct | RQ ( $2^{-\Delta\Delta Ct}$ ) |
| Scrambled         | 20.76     | 20.77   | 15.55 | 15.69   | 5.08        | 0.00              | <b>1.00</b>                   |
|                   | 20.81     |         | 15.73 |         |             |                   |                               |
|                   | 20.74     |         | 15.78 |         |             |                   |                               |
| miR-322 mimic     | 21.12     | 21.21   | 15.82 | 15.81   | 5.40        | 0.32              | <b>0.80</b>                   |
|                   | 21.45     |         | 15.73 |         |             |                   |                               |
|                   | 21.07     |         | 15.89 |         |             |                   |                               |
| miR-322 inhibitor | 19.82     | 20.13   | 15.67 | 15.58   | 4.55        | -0.53             | <b>1.45</b>                   |
|                   | 20.45     |         | 15.49 |         |             |                   |                               |
|                   | 20.12     |         | 15.63 |         |             |                   |                               |
| miR-503 mimic     | 20.98     | 21.06   | 15.84 | 15.87   | 5.18        | 0.10              | <b>0.93</b>                   |
|                   | 20.86     |         | 15.96 |         |             |                   |                               |
|                   | 21.33     |         | 15.82 |         |             |                   |                               |
| miR-503 inhibitor | 20.17     | 20.34   | 15.95 | 15.80   | 4.54        | -0.54             | <b>1.46</b>                   |
|                   | 20.01     |         | 15.77 |         |             |                   |                               |
|                   | 20.84     |         | 15.68 |         |             |                   |                               |
| Replicate 3       |           |         |       |         |             |                   |                               |
|                   | Cyclin E1 | Ct mean | Rpl7  | Ct mean | $\Delta$ Ct | $\Delta\Delta$ Ct | RQ ( $2^{-\Delta\Delta Ct}$ ) |
| Scrambled         | 21.22     | 21.27   | 15.07 | 15.24   | 6.03        | 0.00              | <b>1.00</b>                   |
|                   | 21.2      |         | 15.36 |         |             |                   |                               |
|                   | 21.38     |         | 15.29 |         |             |                   |                               |
| miR-322 mimic     | 22.78     | 22.34   | 15.43 | 15.62   | 6.72        | 0.70              | <b>0.62</b>                   |
|                   | 22.17     |         | 15.73 |         |             |                   |                               |
|                   | 22.07     |         | 15.69 |         |             |                   |                               |
| miR-322 inhibitor | 20.76     | 20.86   | 15.35 | 15.44   | 5.42        | -0.60             | <b>1.52</b>                   |
|                   | 20.88     |         | 15.57 |         |             |                   |                               |
|                   | 20.94     |         | 15.39 |         |             |                   |                               |
| miR-503 mimic     | 21.32     | 21.31   | 15.26 | 15.34   | 5.97        | -0.06             | <b>1.04</b>                   |
|                   | 21.37     |         | 15.26 |         |             |                   |                               |
|                   | 21.23     |         | 15.49 |         |             |                   |                               |
| miR-503 inhibitor | 20.97     | 20.67   | 14.81 | 14.97   | 5.69        | -0.33             | <b>1.26</b>                   |
|                   | 20.38     |         | 15.08 |         |             |                   |                               |
|                   | 20.65     |         | 15.03 |         |             |                   |                               |

| Replicate 1       |        |         |       |         |             |                   |                               |
|-------------------|--------|---------|-------|---------|-------------|-------------------|-------------------------------|
|                   | Cdc25b | Ct mean | Rpl7  | Ct mean | $\Delta$ Ct | $\Delta\Delta$ Ct | RQ ( $2^{-\Delta\Delta Ct}$ ) |
| Scrambled         | 25.81  | 25.88   | 14.87 | 14.91   | 10.97       | 0.00              | <b>1.00</b>                   |
|                   | 25.92  |         | 14.92 |         |             |                   |                               |
|                   | 25.92  |         | 14.95 |         |             |                   |                               |
| miR-322 mimic     | 25.49  | 29.58   | 14.95 | 14.85   | 14.73       | 3.76              | <b>0.07</b>                   |
|                   | 29.54  |         | 14.77 |         |             |                   |                               |
|                   | 29.7   |         | 14.82 |         |             |                   |                               |
| miR-322 inhibitor | 24.78  | 24.66   | 14.74 | 14.77   | 10.09       | -0.88             | <b>1.84</b>                   |
|                   | 24.88  |         | 14.79 |         |             |                   |                               |
|                   | 24.93  |         | 14.78 |         |             |                   |                               |
| Replicate 2       |        |         |       |         |             |                   |                               |
|                   | Cdc25b | Ct mean | Rpl7  | Ct mean | $\Delta$ Ct | $\Delta\Delta$ Ct | RQ ( $2^{-\Delta\Delta Ct}$ ) |
| Scrambled         | 26.82  | 26.67   | 15.23 | 15.31   | 11.36       | 0.00              | <b>1.00</b>                   |
|                   | 26.39  |         | 15.44 |         |             |                   |                               |
|                   | 26.79  |         | 15.26 |         |             |                   |                               |
| miR-322 mimic     | 29.12  | 28.91   | 15.18 | 15.06   | 13.85       | 2.49              | <b>0.18</b>                   |
|                   | 28.88  |         | 14.93 |         |             |                   |                               |
|                   | 28.72  |         | 15.07 |         |             |                   |                               |
| miR-322 inhibitor | 25.98  | 25.96   | 15.18 | 15.20   | 10.76       | -0.60             | <b>1.52</b>                   |
|                   | 26     |         | 15.21 |         |             |                   |                               |
|                   | 25.9   |         | 15.22 |         |             |                   |                               |
| Replicate 3       |        |         |       |         |             |                   |                               |
|                   | Cdc25b | Ct mean | Rpl7  | Ct mean | $\Delta$ Ct | $\Delta\Delta$ Ct | RQ ( $2^{-\Delta\Delta Ct}$ ) |
| Scrambled         | 25.76  | 25.80   | 15.77 | 15.71   | 10.09       | 0.00              | <b>1.00</b>                   |
|                   | 25.94  |         | 15.68 |         |             |                   |                               |
|                   | 25.7   |         | 15.69 |         |             |                   |                               |
| miR-322 mimic     | 29.03  | 29.14   | 15.33 | 15.32   | 13.82       | 3.74              | <b>0.08</b>                   |
|                   | 29.23  |         | 15.28 |         |             |                   |                               |
|                   | 29.17  |         | 15.35 |         |             |                   |                               |
| miR-322 inhibitor | 25.01  | 24.92   | 15.73 | 15.67   | 9.25        | -0.83             | <b>1.78</b>                   |
|                   | 24.84  |         | 15.56 |         |             |                   |                               |
|                   | 24.92  |         | 15.72 |         |             |                   |                               |

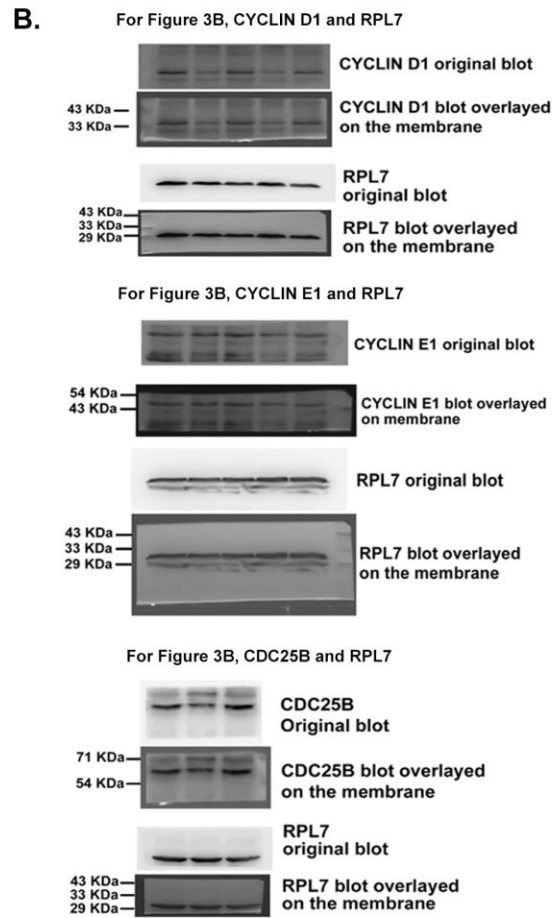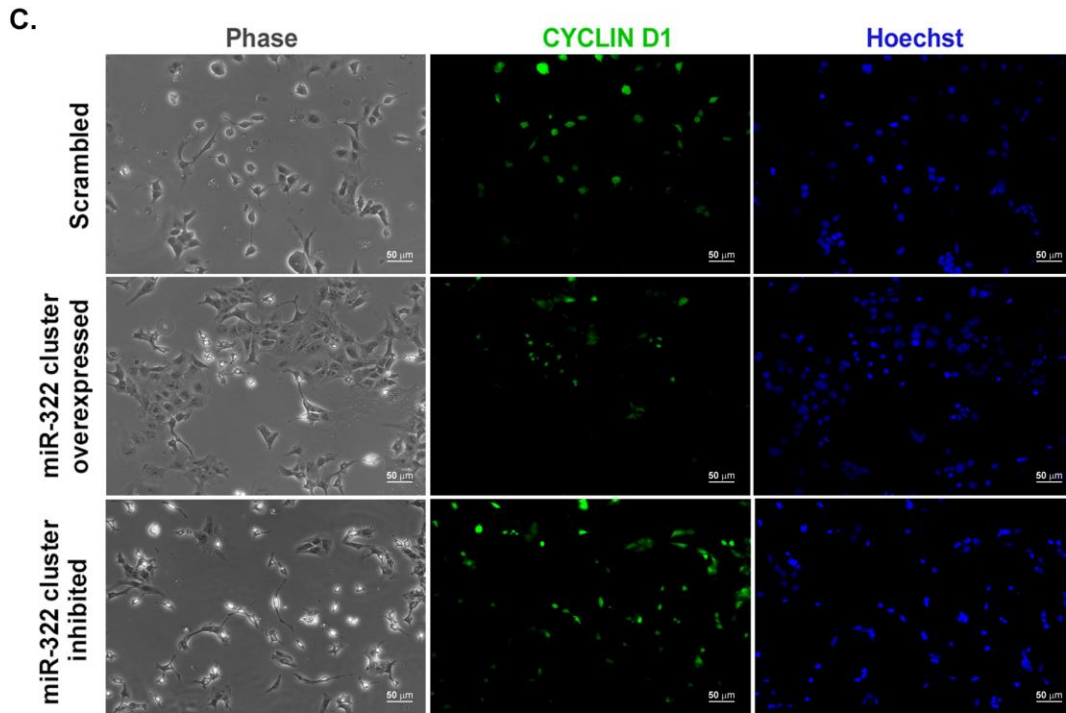

Supplement: LSA-2020-00674_SdataF3.pdf [file LSA-2020-00674_SdataF3.pdf]
