# Supplementary material for: MicroRNA regulation of murine trophoblast stem cell self-renewal and differentiation
Source: PubMed Central journal article supplement (PMC7494815; doi:10.26508/lsa.202000674), 2020-09-09

A.

| BrdU Incorporation Assay      |             |                    |             |                    |             |                    |             |                    |
|-------------------------------|-------------|--------------------|-------------|--------------------|-------------|--------------------|-------------|--------------------|
| 5000 cells                    | Replicate 1 |                    | Replicate 2 |                    | Replicate 3 |                    | Replicate 4 |                    |
|                               | Mean OD     | Rel. incorporation | Mean OD     | Rel. incorporation | Mean OD     | Rel. incorporation | Mean OD     | Rel. incorporation |
| Scrambled                     | 1.956       | 1.000              | 1.693       | 1.000              | 1.743       | 1.000              | 1.874       | 1.000              |
| miR-290 cluster inhibited     | 0.403       | 0.206              | 1.045       | 0.617              | 1.036       | 0.594              | 1.054       | 0.562              |
| miR-322 cluster overexpressed | 1.118       | 0.572              | 0.993       | 0.587              | 0.367       | 0.211              | 1.023       | 0.546              |

  

| 10000 cells                   | Replicate 1 |                    | Replicate 2 |                    | Replicate 3 |                    | Replicate 4 |                    |
|-------------------------------|-------------|--------------------|-------------|--------------------|-------------|--------------------|-------------|--------------------|
|                               | Mean OD     | Rel. incorporation | Mean OD     | Rel. incorporation | Mean OD     | Rel. incorporation | Mean OD     | Rel. incorporation |
| Scrambled                     | 1.981       | 1.000              | 2.24        | 1.000              | 2.432       | 1.000              | 2.299       | 1.000              |
| miR-290 cluster inhibited     | 1.1         | 0.555              | 1.086       | 0.485              | 0.374       | 0.154              | 1.265       | 0.550              |
| miR-322 cluster overexpressed | 0.703       | 0.355              | 0.854       | 0.381              | 0.783       | 0.322              | 0.745       | 0.324              |

B.

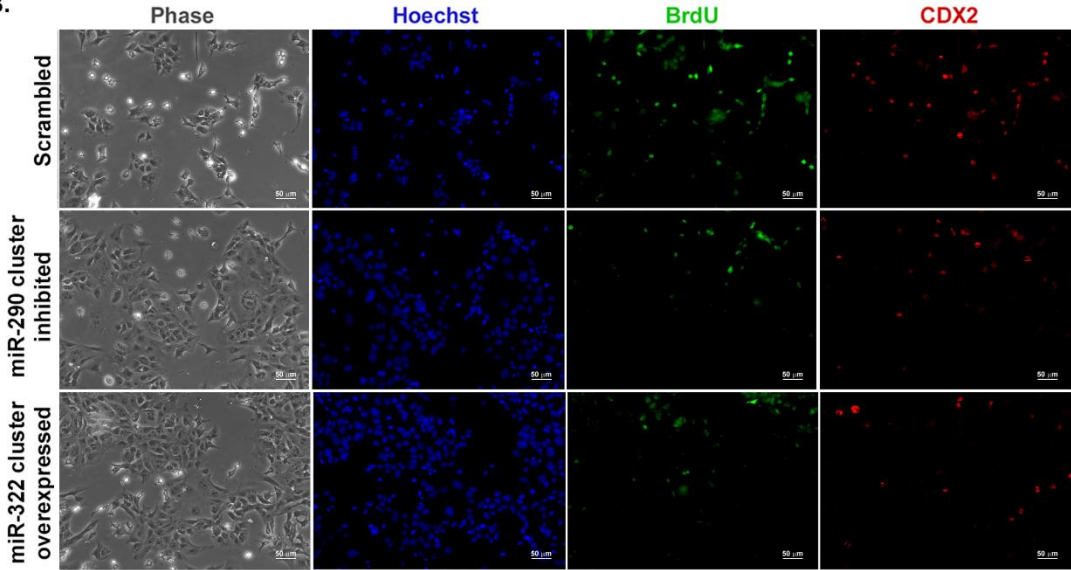

D.

Source data Figure 4

| Replicate 1           |                         |         |                         |         |             |                   |                               |
|-----------------------|-------------------------|---------|-------------------------|---------|-------------|-------------------|-------------------------------|
|                       | Cdx2                    | Ct mean | Rpl7                    | Ct mean | $\Delta$ Ct | $\Delta\Delta$ Ct | RQ ( $2^{-\Delta\Delta Ct}$ ) |
| Scrambled             | 21.93<br>21.83<br>21.94 | 21.90   | 15.9<br>15.81<br>15.96  | 15.89   | 6.01        | 0.00              | 1.00                          |
| 290-cluster inhibited | 22.9<br>23.06<br>23.34  | 23.10   | 15.76<br>15.74<br>15.86 | 15.79   | 7.31        | 1.30              | 0.41                          |
| Replicate 2           |                         |         |                         |         |             |                   |                               |
|                       | Cdx2                    | Ct mean | Rpl7                    | Ct mean | $\Delta$ Ct | $\Delta\Delta$ Ct | RQ ( $2^{-\Delta\Delta Ct}$ ) |
| Scrambled             | 21.43<br>21.48<br>21.56 | 21.49   | 15.26<br>15.18<br>15.12 | 15.19   | 6.30        | 0.00              | 1.00                          |
| 290-cluster inhibited | 23.86<br>23.82<br>23.90 | 23.86   | 15.99<br>15.98<br>15.98 | 15.98   | 7.88        | 1.57              | 0.34                          |
| Replicate 3           |                         |         |                         |         |             |                   |                               |
|                       | Cdx2                    | Ct mean | Rpl7                    | Ct mean | $\Delta$ Ct | $\Delta\Delta$ Ct | RQ ( $2^{-\Delta\Delta Ct}$ ) |
| Scrambled             | 22.21<br>22<br>22.37    | 22.19   | 15.2<br>15.2<br>15.19   | 15.21   | 6.99        | 0.00              | 1.00                          |
| 290-cluster inhibited | 24.02<br>24.26<br>24.32 | 24.20   | 14.75<br>15.06<br>15.12 | 14.98   | 9.22        | 2.24              | 0.21                          |

| Replicate 1           |                         |         |                         |         |             |                   |                               |
|-----------------------|-------------------------|---------|-------------------------|---------|-------------|-------------------|-------------------------------|
|                       | Eomes                   | Ct mean | Rpl7                    | Ct mean | $\Delta$ Ct | $\Delta\Delta$ Ct | RQ ( $2^{-\Delta\Delta Ct}$ ) |
| Scrambled             | 19.97<br>19.74<br>20.36 | 20.02   | 15.92<br>15.83<br>15.8  | 15.85   | 4.17        | 0.00              | 1.00                          |
| 290-cluster inhibited | 21.1<br>21.92<br>21.93  | 21.65   | 15.85<br>15.97<br>15.87 | 15.90   | 5.75        | 1.58              | 0.33                          |
| Replicate 2           |                         |         |                         |         |             |                   |                               |
|                       | Eomes                   | Ct mean | Rpl7                    | Ct mean | $\Delta$ Ct | $\Delta\Delta$ Ct | RQ ( $2^{-\Delta\Delta Ct}$ ) |
| Scrambled             | 20.12<br>20.18<br>20.24 | 20.18   | 14.84<br>14.98<br>15.44 | 15.09   | 5.09        | 0.00              | 1.00                          |
| 290-cluster inhibited | 22.78<br>22.69<br>22.63 | 22.70   | 15.78<br>15.72<br>15.78 | 15.76   | 6.94        | 1.85              | 0.28                          |
| Replicate 3           |                         |         |                         |         |             |                   |                               |
|                       | Eomes                   | Ct mean | Rpl7                    | Ct mean | $\Delta$ Ct | $\Delta\Delta$ Ct | RQ ( $2^{-\Delta\Delta Ct}$ ) |
| Scrambled             | 21.34<br>21.28<br>21.26 | 21.29   | 15.28<br>15.26<br>15.22 | 15.25   | 6.04        | 0.00              | 1.00                          |
| 290-cluster inhibited | 23.97<br>24.01<br>23.99 | 23.99   | 15.73<br>15.77<br>15.69 | 15.73   | 8.26        | 2.22              | 0.21                          |

| Replicate 1           |                         |         |                         |         |             |                   |                               |
|-----------------------|-------------------------|---------|-------------------------|---------|-------------|-------------------|-------------------------------|
|                       | Esrrb                   | Ct mean | Rpl7                    | Ct mean | $\Delta$ Ct | $\Delta\Delta$ Ct | RQ ( $2^{-\Delta\Delta Ct}$ ) |
| Scrambled             | 21.82<br>21.54<br>21.87 | 21.74   | 14.88<br>14.85<br>14.92 | 14.88   | 6.86        | 0.00              | 1.00                          |
| 290-cluster inhibited | 23.97<br>24.06<br>24.32 | 24.12   | 15.55<br>15.74<br>15.59 | 15.63   | 8.49        | 1.63              | 0.32                          |
| Replicate 2           |                         |         |                         |         |             |                   |                               |
|                       | Esrrb                   | Ct mean | Rpl7                    | Ct mean | $\Delta$ Ct | $\Delta\Delta$ Ct | RQ ( $2^{-\Delta\Delta Ct}$ ) |
| Scrambled             | 22.75<br>22.78<br>21.86 | 22.46   | 15.62<br>15.78<br>15.64 | 15.68   | 6.78        | 0.00              | 1.00                          |
| 290-cluster inhibited | 23.72<br>23.68<br>23.6  | 23.67   | 15.94<br>15.99<br>15.98 | 15.97   | 7.70        | 0.91              | 0.53                          |
| Replicate 3           |                         |         |                         |         |             |                   |                               |
|                       | Esrrb                   | Ct mean | Rpl7                    | Ct mean | $\Delta$ Ct | $\Delta\Delta$ Ct | RQ ( $2^{-\Delta\Delta Ct}$ ) |
| Scrambled             | 21.36<br>21.45<br>21.47 | 21.43   | 15.88<br>15.83<br>15.76 | 15.82   | 5.60        | 0.00              | 1.00                          |
| 290-cluster inhibited | 23.91<br>23.98<br>23.01 | 23.63   | 15.65<br>15.69<br>15.58 | 15.64   | 7.99        | 2.39              | 0.19                          |

| Replicate 1           |                         |         |                         |         |             |                   |                               |
|-----------------------|-------------------------|---------|-------------------------|---------|-------------|-------------------|-------------------------------|
|                       | Pif                     | Ct mean | Rpl7                    | Ct mean | $\Delta$ Ct | $\Delta\Delta$ Ct | RQ ( $2^{-\Delta\Delta Ct}$ ) |
| Scrambled             | 23.69<br>23.6<br>23.79  | 23.69   | 15.57<br>15.56<br>15.58 | 15.57   | 8.12        | 0.00              | 1.00                          |
| 290-cluster inhibited | 22.92<br>22.87<br>22.95 | 22.91   | 15.8<br>15.78<br>15.94  | 15.84   | 7.07        | -1.05             | 2.07                          |
| Replicate 2           |                         |         |                         |         |             |                   |                               |
|                       | Pif                     | Ct mean | Rpl7                    | Ct mean | $\Delta$ Ct | $\Delta\Delta$ Ct | RQ ( $2^{-\Delta\Delta Ct}$ ) |
| Scrambled             | 23.12<br>23.17<br>23.04 | 23.11   | 15.77<br>15.81<br>15.76 | 15.78   | 7.33        | 0.00              | 1.00                          |
| 290-cluster inhibited | 22.56<br>22.69<br>22.32 | 22.52   | 16.14<br>16.22<br>16.25 | 16.20   | 6.32        | -1.01             | 2.01                          |
| Replicate 3           |                         |         |                         |         |             |                   |                               |
|                       | Pif                     | Ct mean | Rpl7                    | Ct mean | $\Delta$ Ct | $\Delta\Delta$ Ct | RQ ( $2^{-\Delta\Delta Ct}$ ) |
| Scrambled             | 24.76<br>24.79<br>24.68 | 24.74   | 15.23<br>15.2<br>15.19  | 15.21   | 9.54        | 0.00              | 1.00                          |
| 290-cluster inhibited | 23.91<br>23.96<br>24.04 | 23.97   | 15.99<br>16.18<br>16.01 | 16.06   | 7.91        | -1.63             | 3.09                          |

| Replicate 1           |                         |         |                         |         |             |                   |                               |
|-----------------------|-------------------------|---------|-------------------------|---------|-------------|-------------------|-------------------------------|
|                       | Pl1                     | Ct mean | Rpl7                    | Ct mean | $\Delta$ Ct | $\Delta\Delta$ Ct | RQ ( $2^{-\Delta\Delta Ct}$ ) |
| Scrambled             | 25.1<br>24.97<br>25.22  | 25.10   | 14.94<br>14.94<br>14.92 | 14.93   | 10.16       | 0.00              | 1.00                          |
| 290-cluster inhibited | 21.91<br>22.06<br>21.94 | 21.97   | 14.73<br>14.53<br>14.74 | 14.67   | 7.30        | -2.86             | 7.26                          |
| Replicate 2           |                         |         |                         |         |             |                   |                               |
|                       | Pl1                     | Ct mean | Rpl7                    | Ct mean | $\Delta$ Ct | $\Delta\Delta$ Ct | RQ ( $2^{-\Delta\Delta Ct}$ ) |
| Scrambled             | 25.43<br>25.54<br>25.38 | 25.45   | 14.54<br>14.57<br>14.62 | 14.58   | 10.87       | 0.00              | 1.00                          |
| 290-cluster inhibited | 22.90<br>22.88<br>22.87 | 22.88   | 15.12<br>15.18<br>15.08 | 15.13   | 7.76        | -3.12             | 8.67                          |
| Replicate 3           |                         |         |                         |         |             |                   |                               |
|                       | Pl1                     | Ct mean | Rpl7                    | Ct mean | $\Delta$ Ct | $\Delta\Delta$ Ct | RQ ( $2^{-\Delta\Delta Ct}$ ) |
| Scrambled             | 24.87<br>24.85<br>24.79 | 24.84   | 15.14<br>15.22<br>15.26 | 15.21   | 9.63        | 0.00              | 1.00                          |
| 290-cluster inhibited | 22.97<br>23.07<br>22.99 | 23.01   | 15.78<br>15.83<br>15.92 | 15.84   | 7.17        | -2.46             | 5.51                          |

E.

Source data Figure 4

| Replicate 1               |                         |         |                         |         |             |                   |                               |
|---------------------------|-------------------------|---------|-------------------------|---------|-------------|-------------------|-------------------------------|
|                           | Cdx2                    | Ct mean | Rpl7                    | Ct mean | $\Delta Ct$ | $\Delta\Delta Ct$ | RQ ( $2^{-\Delta\Delta Ct}$ ) |
| Scrambled                 | 21.95<br>21.73<br>21.94 | 21.87   | 15.62<br>15.78<br>15.5  | 15.63   | 6.24        | 0.00              | <b>1.00</b>                   |
| 322-cluster overexpressed | 27.44<br>27.3<br>27.56  | 27.43   | 15.28<br>15.96<br>15.56 | 15.60   | 11.83       | 5.59              | <b>0.02</b>                   |
| Replicate 2               |                         |         |                         |         |             |                   |                               |
|                           | Cdx2                    | Ct mean | Rpl7                    | Ct mean | $\Delta Ct$ | $\Delta\Delta Ct$ | RQ ( $2^{-\Delta\Delta Ct}$ ) |
| Scrambled                 | 21.86<br>21.88<br>21.82 | 21.85   | 14.54<br>14.57<br>14.62 | 14.58   | 7.28        | 0.00              | <b>1.00</b>                   |
| 322-cluster overexpressed | 27.63<br>27.58<br>27.59 | 27.60   | 15.12<br>15.18<br>15.08 | 15.13   | 12.47       | 5.20              | <b>0.03</b>                   |
| Replicate 3               |                         |         |                         |         |             |                   |                               |
|                           | Cdx2                    | Ct mean | Rpl7                    | Ct mean | $\Delta Ct$ | $\Delta\Delta Ct$ | RQ ( $2^{-\Delta\Delta Ct}$ ) |
| Scrambled                 | 21.15<br>21.27<br>21.17 | 21.20   | 16.29<br>16.34<br>16.17 | 16.27   | 4.93        | 0.00              | <b>1.00</b>                   |
| 322-cluster overexpressed | 22.97<br>23.07<br>22.99 | 23.01   | 15.98<br>15.95<br>15.87 | 15.93   | 7.08        | 2.15              | <b>0.23</b>                   |

| Replicate 1               |                         |         |                         |         |             |                   |                               |
|---------------------------|-------------------------|---------|-------------------------|---------|-------------|-------------------|-------------------------------|
|                           | Eomes                   | Ct mean | Rpl7                    | Ct mean | $\Delta Ct$ | $\Delta\Delta Ct$ | RQ ( $2^{-\Delta\Delta Ct}$ ) |
| Scrambled                 | 20.68<br>20.72<br>20.96 | 20.79   | 16.6<br>16.47<br>16.97  | 16.68   | 4.11        | 0.00              | <b>1.00</b>                   |
| 322-cluster overexpressed | 23.75<br>23.71<br>23.87 | 23.78   | 16.56<br>16.6<br>16.83  | 16.66   | 7.11        | 3.01              | <b>0.12</b>                   |
| Replicate 2               |                         |         |                         |         |             |                   |                               |
|                           | Eomes                   | Ct mean | Rpl7                    | Ct mean | $\Delta Ct$ | $\Delta\Delta Ct$ | RQ ( $2^{-\Delta\Delta Ct}$ ) |
| Scrambled                 | 21.22<br>21.18<br>21.16 | 21.19   | 15.29<br>15.33<br>15.56 | 15.39   | 5.79        | 0.00              | <b>1.00</b>                   |
| 322-cluster overexpressed | 23.90<br>23.97<br>23.88 | 23.92   | 15.42<br>15.50<br>15.18 | 15.37   | 8.55        | 2.76              | <b>0.15</b>                   |
| Replicate 3               |                         |         |                         |         |             |                   |                               |
|                           | Eomes                   | Ct mean | Rpl7                    | Ct mean | $\Delta Ct$ | $\Delta\Delta Ct$ | RQ ( $2^{-\Delta\Delta Ct}$ ) |
| Scrambled                 | 21.17<br>21.25<br>21.34 | 21.25   | 15.78<br>15.56<br>15.69 | 15.68   | 5.58        | 0.00              | <b>1.00</b>                   |
| 322-cluster overexpressed | 23.06<br>23.15<br>23.25 | 23.15   | 15.21<br>15.34<br>15.36 | 15.30   | 7.85        | 2.27              | <b>0.21</b>                   |

| Replicate 1               |                         |         |                         |         |             |                   |                               |
|---------------------------|-------------------------|---------|-------------------------|---------|-------------|-------------------|-------------------------------|
|                           | Esrrb                   | Ct mean | Rpl7                    | Ct mean | $\Delta Ct$ | $\Delta\Delta Ct$ | RQ ( $2^{-\Delta\Delta Ct}$ ) |
| Scrambled                 | 22.82<br>22.97<br>23.02 | 22.94   | 15.67<br>15.7<br>15.97  | 15.78   | 7.16        | 0.00              | <b>1.00</b>                   |
| 322-cluster overexpressed | 27.94<br>27.74<br>27.93 | 27.87   | 15.6<br>15.76<br>15.67  | 15.68   | 12.19       | 5.04              | <b>0.03</b>                   |
| Replicate 2               |                         |         |                         |         |             |                   |                               |
|                           | Esrrb                   | Ct mean | Rpl7                    | Ct mean | $\Delta Ct$ | $\Delta\Delta Ct$ | RQ ( $2^{-\Delta\Delta Ct}$ ) |
| Scrambled                 | 21.76<br>21.77<br>21.58 | 21.70   | 15.91<br>15.99<br>15.87 | 15.92   | 5.78        | 0.00              | <b>1.00</b>                   |
| 322-cluster overexpressed | 24.02<br>24.12<br>24.00 | 24.05   | 15.23<br>15.18<br>16.08 | 15.50   | 8.55        | 2.77              | <b>0.15</b>                   |
| Replicate 3               |                         |         |                         |         |             |                   |                               |
|                           | Esrrb                   | Ct mean | Rpl7                    | Ct mean | $\Delta Ct$ | $\Delta\Delta Ct$ | RQ ( $2^{-\Delta\Delta Ct}$ ) |
| Scrambled                 | 22.66<br>22.54<br>22.59 | 22.60   | 16.05<br>16.04<br>15.99 | 16.03   | 6.57        | 0.00              | <b>1.00</b>                   |
| 322-cluster overexpressed | 26.87<br>26.95<br>26.92 | 26.91   | 15.79<br>15.53<br>15.73 | 15.68   | 11.23       | 4.66              | <b>0.04</b>                   |

| Replicate 1               |                         |         |                         |         |             |                   |                               |
|---------------------------|-------------------------|---------|-------------------------|---------|-------------|-------------------|-------------------------------|
|                           | Pif                     | Ct mean | Rpl7                    | Ct mean | $\Delta Ct$ | $\Delta\Delta Ct$ | RQ ( $2^{-\Delta\Delta Ct}$ ) |
| Scrambled                 | 23.58<br>23.63<br>23.91 | 23.71   | 14.92<br>14.96<br>15.04 | 14.97   | 8.73        | 0.00              | <b>1.00</b>                   |
| 322-cluster overexpressed | 19.94<br>20.31<br>20.48 | 20.24   | 14.91<br>14.97<br>14.91 | 14.93   | 5.31        | -3.42             | <b>10.70</b>                  |
| Replicate 2               |                         |         |                         |         |             |                   |                               |
|                           | Pif                     | Ct mean | Rpl7                    | Ct mean | $\Delta Ct$ | $\Delta\Delta Ct$ | RQ ( $2^{-\Delta\Delta Ct}$ ) |
| Scrambled                 | 22.86<br>22.78<br>22.82 | 22.82   | 15.63<br>15.57<br>15.48 | 15.56   | 7.26        | 0.00              | <b>1.00</b>                   |
| 322-cluster overexpressed | 18.97<br>19.12<br>19.26 | 19.12   | 15.82<br>15.74<br>15.51 | 15.69   | 3.43        | -3.83             | <b>14.25</b>                  |
| Replicate 3               |                         |         |                         |         |             |                   |                               |
|                           | Pif                     | Ct mean | Rpl7                    | Ct mean | $\Delta Ct$ | $\Delta\Delta Ct$ | RQ ( $2^{-\Delta\Delta Ct}$ ) |
| Scrambled                 | 23.7<br>23.58<br>23.59  | 23.62   | 15.34<br>15.47<br>15.39 | 15.40   | 8.22        | 0.00              | <b>1.00</b>                   |
| 322-cluster overexpressed | 20.22<br>20.37<br>21.17 | 20.59   | 15.92<br>15.73<br>15.88 | 15.84   | 4.74        | -3.48             | <b>11.16</b>                  |

| Replicate 1               |                         |         |                         |         |             |                   |                               |
|---------------------------|-------------------------|---------|-------------------------|---------|-------------|-------------------|-------------------------------|
|                           | Pl1                     | Ct mean | Rpl7                    | Ct mean | $\Delta Ct$ | $\Delta\Delta Ct$ | RQ ( $2^{-\Delta\Delta Ct}$ ) |
| Scrambled                 | 25.07<br>24.6<br>24.72  | 24.80   | 15.78<br>15.97<br>15.97 | 15.91   | 8.89        | 0.00              | <b>1.00</b>                   |
| 322-cluster overexpressed | 21.12<br>21.3<br>21.16  | 21.19   | 15.94<br>15.79<br>15.97 | 15.90   | 5.29        | -3.60             | <b>12.10</b>                  |
| Replicate 2               |                         |         |                         |         |             |                   |                               |
|                           | Pl1                     | Ct mean | Rpl7                    | Ct mean | $\Delta Ct$ | $\Delta\Delta Ct$ | RQ ( $2^{-\Delta\Delta Ct}$ ) |
| Scrambled                 | 24.42<br>24.58<br>24.73 | 24.58   | 15.52<br>15.59<br>15.63 | 15.58   | 9.00        | 0.00              | <b>1.00</b>                   |
| 322-cluster overexpressed | 21.95<br>22.02<br>22.29 | 22.09   | 16.26<br>16.38<br>16.52 | 16.39   | 5.70        | -3.30             | <b>9.83</b>                   |
| Replicate 3               |                         |         |                         |         |             |                   |                               |
|                           | Pl1                     | Ct mean | Rpl7                    | Ct mean | $\Delta Ct$ | $\Delta\Delta Ct$ | RQ ( $2^{-\Delta\Delta Ct}$ ) |
| Scrambled                 | 23.89<br>23.71<br>23.96 | 23.85   | 15.74<br>15.83<br>15.87 | 15.81   | 8.04        | 0.00              | <b>1.00</b>                   |
| 322-cluster overexpressed | 19.89<br>19.75<br>19.78 | 19.81   | 16.01<br>15.99<br>15.82 | 15.94   | 3.87        | -4.17             | <b>18.04</b>                  |

F.

For Figure 4F. CDX2, PLF and RPL7

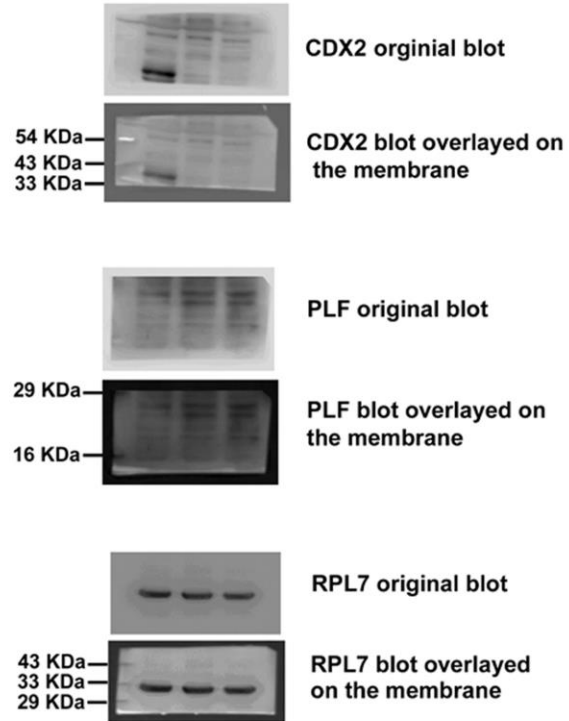

Supplement: LSA-2020-00674_SdataF4.pdf [file LSA-2020-00674_SdataF4.pdf]
