# Supplementary material for: MicroRNA regulation of murine trophoblast stem cell self-renewal and differentiation
Source: PubMed Central journal article supplement (PMC7494815; doi:10.26508/lsa.202000674), 2020-09-09

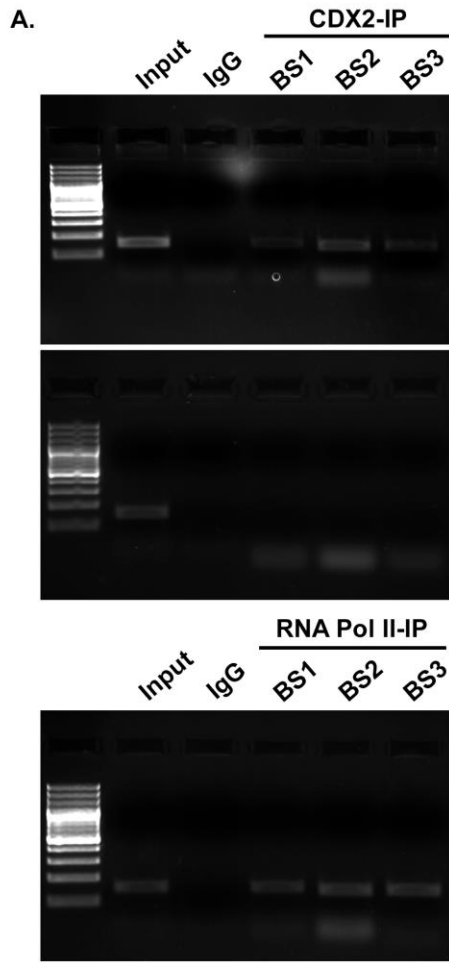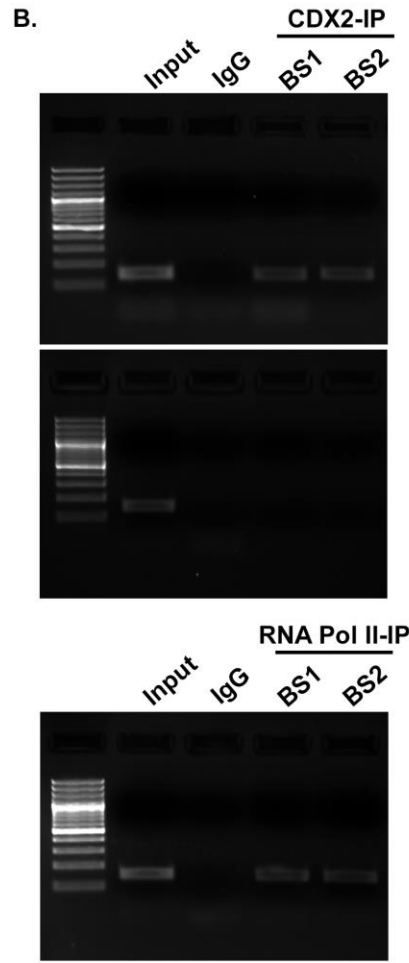

**C.**

| Replicate   | Cyclin D1 | Ct mean | Rpl7  | Ct mean | $\Delta Ct$ | $\Delta\Delta Ct$ | RRQ ( $2^{-\Delta\Delta Ct}$ ) |
|-------------|-----------|---------|-------|---------|-------------|-------------------|--------------------------------|
| Replicate 1 | Scrambled | 22.59   | 22.71 | 15.6    | 15.59       | 7.12              | 0.00                           |
|             |           | 22.64   |       | 15.52   |             |                   | 1.00                           |
|             |           | 22.91   |       | 15.66   |             |                   |                                |
| Replicate 1 | si-Cdx2   | 24.23   | 24.18 | 15.55   | 15.74       | 8.43              | 1.31                           |
|             |           | 24.1    |       | 15.7    |             |                   | 0.40                           |
|             |           | 24.2    |       | 15.98   |             |                   |                                |
| Replicate 2 | Scrambled | 21.7    | 21.39 | 15.42   | 15.45       | 5.94              | 0.00                           |
|             |           | 21.09   |       | 15.49   |             |                   | 1.00                           |
|             |           | 21.37   |       | 15.44   |             |                   |                                |
| Replicate 2 | si-Cdx2   | 22.83   | 22.55 | 15.86   | 15.80       | 6.75              | 0.81                           |
|             |           | 22.26   |       | 15.83   |             |                   | 0.57                           |
|             |           | 22.56   |       | 15.71   |             |                   |                                |
| Replicate 3 | Scrambled | 21      | 21.50 | 15.37   | 15.04       | 6.46              | 0.00                           |
|             |           | 21.21   |       | 14.92   |             |                   | 1.00                           |
|             |           | 22.28   |       | 14.83   |             |                   |                                |
| Replicate 3 | si-Cdx2   | 24.04   | 24.06 | 15.22   | 15.26       | 8.80              | 2.34                           |
|             |           | 23.87   |       | 15.18   |             |                   | 0.20                           |
|             |           | 24.28   |       | 15.39   |             |                   |                                |

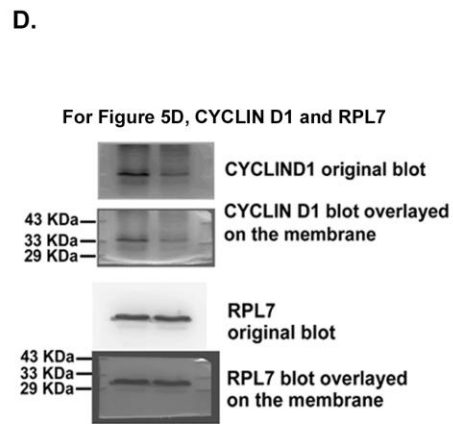

E.

Source data Figure 5

| Replicate 1 |             |         |         |         |             |                   |                               |
|-------------|-------------|---------|---------|---------|-------------|-------------------|-------------------------------|
|             | miR-291a-3p | Ct mean | U6snRNA | Ct mean | $\Delta Ct$ | $\Delta\Delta Ct$ | RQ ( $2^{-\Delta\Delta Ct}$ ) |
| Scrambled   | 21.44       | 21.25   | 19.89   | 19.91   | 1.34        | 0.00              | 1.00                          |
|             | 21.37       |         | 19.86   |         |             |                   |                               |
|             | 20.94       |         | 19.97   |         |             |                   |                               |
| si-Cdx2     | 22.53       | 22.31   | 19.81   | 19.80   | 2.52        | 1.17              | 0.44                          |
|             | 22.14       |         | 19.74   |         |             |                   |                               |
|             | 22.27       |         | 19.84   |         |             |                   |                               |
| Replicate 2 |             |         |         |         |             |                   |                               |
|             | miR-291a-3p | Ct mean | U6snRNA | Ct mean | $\Delta Ct$ | $\Delta\Delta Ct$ | RQ ( $2^{-\Delta\Delta Ct}$ ) |
| Scrambled   | 21.3        | 21.32   | 19.28   | 19.29   | 2.02        | 0.00              | 1.00                          |
|             | 21.28       |         | 19.32   |         |             |                   |                               |
|             | 21.37       |         | 19.28   |         |             |                   |                               |
| si-Cdx2     | 22.03       | 22.28   | 19.67   | 19.63   | 2.65        | 0.62              | 0.65                          |
|             | 22.35       |         | 19.59   |         |             |                   |                               |
|             | 22.46       |         | 19.64   |         |             |                   |                               |
| Replicate 3 |             |         |         |         |             |                   |                               |
|             | miR-291a-3p | Ct mean | U6snRNA | Ct mean | $\Delta Ct$ | $\Delta\Delta Ct$ | RQ ( $2^{-\Delta\Delta Ct}$ ) |
| Scrambled   | 20.89       | 20.92   | 20.07   | 20.13   | 0.79        | 0.00              | 1.00                          |
|             | 20.92       |         | 20.17   |         |             |                   |                               |
|             | 20.96       |         | 20.15   |         |             |                   |                               |
| si-Cdx2     | 21.76       | 21.40   | 19.98   | 19.97   | 1.42        | 0.63              | 0.65                          |
|             | 21.18       |         | 20.04   |         |             |                   |                               |
|             | 21.25       |         | 19.9    |         |             |                   |                               |

| Replicate 1 |             |         |         |         |             |                   |                               |
|-------------|-------------|---------|---------|---------|-------------|-------------------|-------------------------------|
|             | miR-291b-3p | Ct mean | U6snRNA | Ct mean | $\Delta Ct$ | $\Delta\Delta Ct$ | RQ ( $2^{-\Delta\Delta Ct}$ ) |
| Scrambled   | 22.66       | 22.71   | 19.84   | 19.91   | 2.80        | 0.00              | 1.00                          |
|             | 22.66       |         | 19.9    |         |             |                   |                               |
|             | 22.81       |         | 19.98   |         |             |                   |                               |
| si-Cdx2     | 23.84       | 23.82   | 19.84   | 19.85   | 3.97        | 1.17              | 0.44                          |
|             | 23.69       |         | 19.85   |         |             |                   |                               |
|             | 23.94       |         | 19.86   |         |             |                   |                               |
| Replicate 2 |             |         |         |         |             |                   |                               |
|             | miR-291b-3p | Ct mean | U6snRNA | Ct mean | $\Delta Ct$ | $\Delta\Delta Ct$ | RQ ( $2^{-\Delta\Delta Ct}$ ) |
| Scrambled   | 23.13       | 23.13   | 20.03   | 20.06   | 3.08        | 0.00              | 1.00                          |
|             | 23.09       |         | 20.1    |         |             |                   |                               |
|             | 23.18       |         | 20.04   |         |             |                   |                               |
| si-Cdx2     | 23.98       | 23.99   | 20.28   | 20.25   | 3.75        | 0.67              | 0.63                          |
|             | 24.03       |         | 20.19   |         |             |                   |                               |
|             | 23.97       |         | 20.27   |         |             |                   |                               |
| Replicate 3 |             |         |         |         |             |                   |                               |
|             | miR-291b-3p | Ct mean | U6snRNA | Ct mean | $\Delta Ct$ | $\Delta\Delta Ct$ | RQ ( $2^{-\Delta\Delta Ct}$ ) |
| Scrambled   | 22.27       | 22.21   | 19.77   | 19.77   | 2.44        | 0.00              | 1.00                          |
|             | 22.11       |         | 19.83   |         |             |                   |                               |
|             | 22.24       |         | 19.71   |         |             |                   |                               |
| si-Cdx2     | 23.32       | 23.27   | 19.54   | 19.52   | 3.75        | 1.32              | 0.40                          |
|             | 23.26       |         | 19.49   |         |             |                   |                               |
|             | 23.24       |         | 19.53   |         |             |                   |                               |

| Replicate 1 |             |         |         |         |             |                   |                               |
|-------------|-------------|---------|---------|---------|-------------|-------------------|-------------------------------|
|             | miR-292a-3p | Ct mean | U6snRNA | Ct mean | $\Delta Ct$ | $\Delta\Delta Ct$ | RQ ( $2^{-\Delta\Delta Ct}$ ) |
| Scrambled   | 21.96       | 21.96   | 19.73   | 19.75   | 2.21        | 0.00              | 1.00                          |
|             | 21.95       |         | 19.75   |         |             |                   |                               |
|             | 21.98       |         | 19.77   |         |             |                   |                               |
| si-Cdx2     | 22.91       | 22.84   | 19.95   | 19.97   | 2.87        | 0.66              | 0.63                          |
|             | 22.67       |         | 19.97   |         |             |                   |                               |
|             | 22.94       |         | 19.98   |         |             |                   |                               |
| Replicate 2 |             |         |         |         |             |                   |                               |
|             | miR-292a-3p | Ct mean | U6snRNA | Ct mean | $\Delta Ct$ | $\Delta\Delta Ct$ | RQ ( $2^{-\Delta\Delta Ct}$ ) |
| Scrambled   | 21.72       | 21.73   | 20.32   | 20.43   | 1.30        | 0.00              | 1.00                          |
|             | 21.78       |         | 20.47   |         |             |                   |                               |
|             | 21.68       |         | 20.49   |         |             |                   |                               |
| si-Cdx2     | 22.19       | 22.13   | 19.97   | 19.94   | 2.19        | 0.89              | 0.54                          |
|             | 22.12       |         | 19.93   |         |             |                   |                               |
|             | 22.08       |         | 19.91   |         |             |                   |                               |
| Replicate 3 |             |         |         |         |             |                   |                               |
|             | miR-292a-3p | Ct mean | U6snRNA | Ct mean | $\Delta Ct$ | $\Delta\Delta Ct$ | RQ ( $2^{-\Delta\Delta Ct}$ ) |
| Scrambled   | 21.37       | 21.37   | 19.76   | 19.72   | 1.64        | 0.00              | 1.00                          |
|             | 21.32       |         | 19.69   |         |             |                   |                               |
|             | 21.41       |         | 19.72   |         |             |                   |                               |
| si-Cdx2     | 22.23       | 22.24   | 19.14   | 19.21   | 3.03        | 1.39              | 0.38                          |
|             | 22.28       |         | 19.2    |         |             |                   |                               |
|             | 22.21       |         | 19.28   |         |             |                   |                               |

| Replicate 1 |            |         |         |         |             |                   |                               |
|-------------|------------|---------|---------|---------|-------------|-------------------|-------------------------------|
|             | miR-294-3p | Ct mean | U6snRNA | Ct mean | $\Delta Ct$ | $\Delta\Delta Ct$ | RQ ( $2^{-\Delta\Delta Ct}$ ) |
| Scrambled   | 20.94      | 20.88   | 19.32   | 19.20   | 1.68        | 0.00              | 1.00                          |
|             | 20.96      |         | 19.07   |         |             |                   |                               |
|             | 20.75      |         | 19.22   |         |             |                   |                               |
| si-Cdx2     | 21.77      | 21.67   | 18.63   | 18.59   | 3.08        | 1.40              | 0.38                          |
|             | 21.67      |         | 18.59   |         |             |                   |                               |
|             | 21.57      |         | 18.55   |         |             |                   |                               |
| Replicate 2 |            |         |         |         |             |                   |                               |
|             | miR-294-3p | Ct mean | U6snRNA | Ct mean | $\Delta Ct$ | $\Delta\Delta Ct$ | RQ ( $2^{-\Delta\Delta Ct}$ ) |
| Scrambled   | 21.12      | 21.16   | 19.45   | 19.45   | 1.72        | 0.00              | 1.00                          |
|             | 21.28      |         | 19.46   |         |             |                   |                               |
|             | 21.09      |         | 19.43   |         |             |                   |                               |
| si-Cdx2     | 22.98      | 23.05   | 19.83   | 19.83   | 3.22        | 1.50              | 0.35                          |
|             | 23.06      |         | 19.79   |         |             |                   |                               |
|             | 23.11      |         | 19.87   |         |             |                   |                               |
| Replicate 3 |            |         |         |         |             |                   |                               |
|             | miR-294-3p | Ct mean | U6snRNA | Ct mean | $\Delta Ct$ | $\Delta\Delta Ct$ | RQ ( $2^{-\Delta\Delta Ct}$ ) |
| Scrambled   | 21.75      | 21.66   | 19.34   | 19.39   | 2.28        | 0.00              | 1.00                          |
|             | 21.79      |         | 19.44   |         |             |                   |                               |
|             | 21.45      |         | 19.38   |         |             |                   |                               |
| si-Cdx2     | 22.95      | 23.01   | 19.25   | 19.21   | 3.80        | 1.52              | 0.35                          |
|             | 23.14      |         | 19.09   |         |             |                   |                               |
|             | 22.93      |         | 19.28   |         |             |                   |                               |

| Replicate 1 |            |         |         |         |             |                   |                               |
|-------------|------------|---------|---------|---------|-------------|-------------------|-------------------------------|
|             | miR-295-3p | Ct mean | U6snRNA | Ct mean | $\Delta Ct$ | $\Delta\Delta Ct$ | RQ ( $2^{-\Delta\Delta Ct}$ ) |
| Scrambled   | 21.99      | 21.90   | 18.8    | 18.89   | 3.01        | 0.00              | 1.00                          |
|             | 21.91      |         | 18.74   |         |             |                   |                               |
|             | 21.79      |         | 19.13   |         |             |                   |                               |
| si-Cdx2     | 22.96      | 22.82   | 18.12   | 18.54   | 4.28        | 1.27              | 0.41                          |
|             | 22.75      |         | 18.7    |         |             |                   |                               |
|             | 22.75      |         | 18.81   |         |             |                   |                               |
| Replicate 2 |            |         |         |         |             |                   |                               |
|             | miR-295-3p | Ct mean | U6snRNA | Ct mean | $\Delta Ct$ | $\Delta\Delta Ct$ | RQ ( $2^{-\Delta\Delta Ct}$ ) |
| Scrambled   | 22.22      | 22.26   | 19.32   | 19.29   | 2.98        | 0.00              | 1.00                          |
|             | 22.31      |         | 19.28   |         |             |                   |                               |
|             | 22.26      |         | 19.26   |         |             |                   |                               |
| si-Cdx2     | 24.88      | 24.84   | 20.17   | 20.11   | 4.73        | 1.76              | 0.30                          |
|             | 24.89      |         | 20.03   |         |             |                   |                               |
|             | 24.75      |         | 20.12   |         |             |                   |                               |
| Replicate 3 |            |         |         |         |             |                   |                               |
|             | miR-295-3p | Ct mean | U6snRNA | Ct mean | $\Delta Ct$ | $\Delta\Delta Ct$ | RQ ( $2^{-\Delta\Delta Ct}$ ) |
| Scrambled   | 22.46      | 22.59   | 20.37   | 20.33   | 2.26        | 0.00              | 1.00                          |
|             | 22.58      |         | 20.35   |         |             |                   |                               |
|             | 22.73      |         | 20.28   |         |             |                   |                               |
| si-Cdx2     | 25.28      | 25.35   | 19.16   | 19.11   | 6.24        | 3.98              | 0.06                          |
|             | 25.4       |         | 19.03   |         |             |                   |                               |
|             | 25.36      |         | 19.14   |         |             |                   |                               |

F.

Source data Figure 5

| Replicate 1 |             |         |         |         |             |                   |                             |
|-------------|-------------|---------|---------|---------|-------------|-------------------|-----------------------------|
|             | miR-291a-3p | Ct mean | U6snRNA | Ct mean | $\Delta Ct$ | $\Delta\Delta Ct$ | $RQ (2^{-\Delta\Delta Ct})$ |
| FLAG        | 27.54       | 27.65   | 19.51   | 19.53   | 8.12        | 0.00              | 1.00                        |
|             | 27.62       |         | 19.54   |         |             |                   |                             |
|             | 27.8        |         | 19.55   |         |             |                   |                             |
| CDX2-OE     | 26.82       | 26.88   | 19.79   | 19.89   | 6.99        | -1.13             | 2.19                        |
|             | 26.86       |         | 19.94   |         |             |                   |                             |
|             | 26.97       |         | 19.95   |         |             |                   |                             |
| Replicate 2 |             |         |         |         |             |                   |                             |
|             | miR-291a-3p | Ct mean | U6snRNA | Ct mean | $\Delta Ct$ | $\Delta\Delta Ct$ | $RQ (2^{-\Delta\Delta Ct})$ |
| FLAG        | 27.24       | 27.32   | 18.86   | 18.80   | 8.52        | 0.00              | 1.00                        |
|             | 27.37       |         | 18.72   |         |             |                   |                             |
|             | 27.36       |         | 18.82   |         |             |                   |                             |
| CDX2-OE     | 26.09       | 26.09   | 18.76   | 18.84   | 7.25        | -1.28             | 2.42                        |
|             | 26.12       |         | 19      |         |             |                   |                             |
|             | 26.05       |         | 18.76   |         |             |                   |                             |
| Replicate 3 |             |         |         |         |             |                   |                             |
|             | miR-291a-3p | Ct mean | U6snRNA | Ct mean | $\Delta Ct$ | $\Delta\Delta Ct$ | $RQ (2^{-\Delta\Delta Ct})$ |
| FLAG        | 26.95       | 26.97   | 19.98   | 19.89   | 7.07        | 0.00              | 1.00                        |
|             | 26.93       |         | 19.87   |         |             |                   |                             |
|             | 27.02       |         | 19.83   |         |             |                   |                             |
| CDX2-OE     | 25.92       | 25.78   | 19.66   | 19.68   | 6.10        | -0.97             | 1.96                        |
|             | 25.45       |         | 19.63   |         |             |                   |                             |
|             | 25.96       |         | 19.74   |         |             |                   |                             |

| Replicate 1 |             |         |         |         |             |                   |                             |
|-------------|-------------|---------|---------|---------|-------------|-------------------|-----------------------------|
|             | miR-291b-3p | Ct mean | U6snRNA | Ct mean | $\Delta Ct$ | $\Delta\Delta Ct$ | $RQ (2^{-\Delta\Delta Ct})$ |
| FLAG        | 26.74       | 26.86   | 19.49   | 19.52   | 7.34        | 0.00              | 1.00                        |
|             | 26.85       |         | 19.52   |         |             |                   |                             |
|             | 26.98       |         | 19.54   |         |             |                   |                             |
| CDX2-OE     | 26.34       | 26.45   | 19.87   | 19.92   | 6.53        | -0.81             | 1.75                        |
|             | 26.46       |         | 19.95   |         |             |                   |                             |
|             | 26.54       |         | 19.93   |         |             |                   |                             |
| Replicate 2 |             |         |         |         |             |                   |                             |
|             | miR-291b-3p | Ct mean | U6snRNA | Ct mean | $\Delta Ct$ | $\Delta\Delta Ct$ | $RQ (2^{-\Delta\Delta Ct})$ |
| FLAG        | 26.12       | 26.21   | 19.39   | 19.37   | 6.84        | 0.00              | 1.00                        |
|             | 26.11       |         | 19.34   |         |             |                   |                             |
|             | 26.41       |         | 19.39   |         |             |                   |                             |
| CDX2-OE     | 25.81       | 25.77   | 19.65   | 19.81   | 5.96        | -0.88             | 1.84                        |
|             | 25.76       |         | 19.99   |         |             |                   |                             |
|             | 25.73       |         | 19.78   |         |             |                   |                             |
| Replicate 3 |             |         |         |         |             |                   |                             |
|             | miR-291b-3p | Ct mean | U6snRNA | Ct mean | $\Delta Ct$ | $\Delta\Delta Ct$ | $RQ (2^{-\Delta\Delta Ct})$ |
| FLAG        | 26.52       | 26.51   | 19.61   | 19.63   | 6.89        | 0.00              | 1.00                        |
|             | 26.59       |         | 19.67   |         |             |                   |                             |
|             | 26.43       |         | 19.6    |         |             |                   |                             |
| CDX2-OE     | 25.92       | 25.68   | 19.63   | 19.41   | 6.27        | -0.62             | 1.54                        |
|             | 25.72       |         | 19.33   |         |             |                   |                             |
|             | 25.39       |         | 19.27   |         |             |                   |                             |

| Replicate 1 |             |         |         |         |             |                   |                             |
|-------------|-------------|---------|---------|---------|-------------|-------------------|-----------------------------|
|             | miR-292a-3p | Ct mean | U6snRNA | Ct mean | $\Delta Ct$ | $\Delta\Delta Ct$ | $RQ (2^{-\Delta\Delta Ct})$ |
| FLAG        | 21.79       | 21.87   | 19.45   | 19.50   | 2.37        | 0.00              | 1.00                        |
|             | 21.88       |         | 19.55   |         |             |                   |                             |
|             | 21.95       |         | 19.5    |         |             |                   |                             |
| CDX2-OE     | 21.45       | 21.54   | 19.85   | 19.92   | 1.62        | -0.75             | 1.68                        |
|             | 21.53       |         | 19.94   |         |             |                   |                             |
|             | 21.64       |         | 19.96   |         |             |                   |                             |
| Replicate 2 |             |         |         |         |             |                   |                             |
|             | miR-292a-3p | Ct mean | U6snRNA | Ct mean | $\Delta Ct$ | $\Delta\Delta Ct$ | $RQ (2^{-\Delta\Delta Ct})$ |
| FLAG        | 21.23       | 21.28   | 18.89   | 18.86   | 2.42        | 0.00              | 1.00                        |
|             | 21.29       |         | 18.88   |         |             |                   |                             |
|             | 21.32       |         | 18.82   |         |             |                   |                             |
| CDX2-OE     | 20.83       | 20.82   | 19.03   | 18.96   | 1.86        | -0.56             | 1.47                        |
|             | 20.78       |         | 18.87   |         |             |                   |                             |
|             | 20.85       |         | 18.98   |         |             |                   |                             |
| Replicate 3 |             |         |         |         |             |                   |                             |
|             | miR-292a-3p | Ct mean | U6snRNA | Ct mean | $\Delta Ct$ | $\Delta\Delta Ct$ | $RQ (2^{-\Delta\Delta Ct})$ |
| FLAG        | 22.34       | 22.32   | 19.55   | 19.43   | 2.89        | 0.00              | 1.00                        |
|             | 22.27       |         | 19.37   |         |             |                   |                             |
|             | 22.35       |         | 19.38   |         |             |                   |                             |
| CDX2-OE     | 21.88       | 21.79   | 19.72   | 19.71   | 2.08        | -0.81             | 1.75                        |
|             | 21.9        |         | 19.78   |         |             |                   |                             |
|             | 21.58       |         | 19.63   |         |             |                   |                             |

| Replicate 1 |            |         |         |         |             |                   |                             |
|-------------|------------|---------|---------|---------|-------------|-------------------|-----------------------------|
|             | miR-294-3p | Ct mean | U6snRNA | Ct mean | $\Delta Ct$ | $\Delta\Delta Ct$ | $RQ (2^{-\Delta\Delta Ct})$ |
| FLAG        | 20.67      | 20.78   | 18.73   | 18.80   | 1.98        | 0.00              | 1.00                        |
|             | 20.78      |         | 18.74   |         |             |                   |                             |
|             | 20.9       |         | 18.94   |         |             |                   |                             |
| CDX2-OE     | 20.05      | 20.14   | 18.99   | 19.03   | 1.11        | -0.87             | 1.83                        |
|             | 20.13      |         | 19.02   |         |             |                   |                             |
|             | 20.24      |         | 19.08   |         |             |                   |                             |
| Replicate 2 |            |         |         |         |             |                   |                             |
|             | miR-294-3p | Ct mean | U6snRNA | Ct mean | $\Delta Ct$ | $\Delta\Delta Ct$ | $RQ (2^{-\Delta\Delta Ct})$ |
| FLAG        | 21.77      | 21.69   | 19.28   | 19.24   | 2.44        | 0.00              | 1.00                        |
|             | 21.56      |         | 19.28   |         |             |                   |                             |
|             | 21.73      |         | 19.17   |         |             |                   |                             |
| CDX2-OE     | 21.03      | 21.06   | 19.22   | 19.27   | 1.79        | -0.65             | 1.57                        |
|             | 21.05      |         | 19.39   |         |             |                   |                             |
|             | 21.1       |         | 19.2    |         |             |                   |                             |
| Replicate 3 |            |         |         |         |             |                   |                             |
|             | miR-294-3p | Ct mean | U6snRNA | Ct mean | $\Delta Ct$ | $\Delta\Delta Ct$ | $RQ (2^{-\Delta\Delta Ct})$ |
| FLAG        | 21.29      | 21.41   | 19.03   | 19.11   | 2.30        | 0.00              | 1.00                        |
|             | 21.38      |         | 19.17   |         |             |                   |                             |
|             | 21.57      |         | 19.13   |         |             |                   |                             |
| CDX2-OE     | 20.8       | 20.91   | 19.64   | 19.58   | 1.33        | -0.97             | 1.96                        |
|             | 20.98      |         | 19.58   |         |             |                   |                             |
|             | 20.95      |         | 19.52   |         |             |                   |                             |

| Replicate 1 |            |         |         |         |             |                   |                             |
|-------------|------------|---------|---------|---------|-------------|-------------------|-----------------------------|
|             | miR-295-3p | Ct mean | U6snRNA | Ct mean | $\Delta Ct$ | $\Delta\Delta Ct$ | $RQ (2^{-\Delta\Delta Ct})$ |
| FLAG        | 22.49      | 22.62   | 19.64   | 19.61   | 3.02        | 0.00              | 1.00                        |
|             | 22.61      |         | 19.58   |         |             |                   |                             |
|             | 22.77      |         | 19.6    |         |             |                   |                             |
| CDX2-OE     | 21.8       | 21.89   | 19.96   | 19.94   | 1.95        | -1.07             | 2.09                        |
|             | 21.87      |         | 19.92   |         |             |                   |                             |
|             | 22.01      |         | 19.95   |         |             |                   |                             |
| Replicate 2 |            |         |         |         |             |                   |                             |
|             | miR-295-3p | Ct mean | U6snRNA | Ct mean | $\Delta Ct$ | $\Delta\Delta Ct$ | $RQ (2^{-\Delta\Delta Ct})$ |
| FLAG        | 21.67      | 21.65   | 18.82   | 18.81   | 2.84        | 0.00              | 1.00                        |
|             | 21.55      |         | 18.73   |         |             |                   |                             |
|             | 21.74      |         | 18.89   |         |             |                   |                             |
| CDX2-OE     | 20.98      | 21.04   | 19.03   | 19.08   | 1.96        | -0.88             | 1.84                        |
|             | 21.04      |         | 19      |         |             |                   |                             |
|             | 21.09      |         | 19.21   |         |             |                   |                             |
| Replicate 3 |            |         |         |         |             |                   |                             |
|             | miR-295-3p | Ct mean | U6snRNA | Ct mean | $\Delta Ct$ | $\Delta\Delta Ct$ | $RQ (2^{-\Delta\Delta Ct})$ |
| FLAG        | 22.27      | 22.29   | 19.52   | 19.57   | 2.71        | 0.00              | 1.00                        |
|             | 22.21      |         | 19.57   |         |             |                   |                             |
|             | 22.38      |         | 19.63   |         |             |                   |                             |
| CDX2-OE     | 20.62      | 20.76   | 19.03   | 19.20   | 1.56        | -1.15             | 2.22                        |
|             | 20.78      |         | 19.4    |         |             |                   |                             |
|             | 20.87      |         | 19.16   |         |             |                   |                             |

Source data Figure 5

G.

| Dual Luciferase Assay |            |             |                  |             |                  |             |                  |             |                  |
|-----------------------|------------|-------------|------------------|-------------|------------------|-------------|------------------|-------------|------------------|
| Wild-type             |            | Replicate 1 |                  | Replicate 2 |                  | Replicate 3 |                  | Replicate 4 |                  |
|                       |            | Mean OD     | Rel.Luc.activity | Mean OD     | Rel.Luc.activity | Mean OD     | Rel.Luc.activity | Mean OD     | Rel.Luc.activity |
| Scrambled             | Firefly    | 7395848     |                  | 9800932     |                  | 10502088    |                  | 10146996    |                  |
|                       | Renilla    | 888258      |                  | 917056      |                  | 699471      |                  | 596727      |                  |
|                       | Normalized | 8.32623855  | 1.000            | 10.687387   | 1.000            | 15.0143294  | 1.000            | 17.004419   | 1.000            |
| miR-322-5p mimic      | Firefly    | 5033299     |                  | 5130506     |                  | 4475373     |                  | 3689315     |                  |
|                       | Renilla    | 1133363     |                  | 1401701     |                  | 1399100     |                  | 1301466     |                  |
|                       | Normalized | 4.44102993  | 0.533            | 3.6602      | 0.342            | 3.19875134  | 0.213            | 2.8347379   | 0.167            |
| miR-503-5p mimic      | Firefly    | 6915039     |                  | 8971951     |                  | 7605606     |                  | 6814701     |                  |
|                       | Renilla    | 943075      |                  | 1427190     |                  | 1252326     |                  | 995071      |                  |
|                       | Normalized | 7.33243804  | 0.881            | 6.2864447   | 0.588            | 6.07318382  | 0.404            | 6.848457    | 0.403            |
| miR-542-5p mimic      | Firefly    | 7480058     |                  | 10030614    |                  | 9131519     |                  | 6827893     |                  |
|                       | Renilla    | 1082097     |                  | 1412781     |                  | 1363781     |                  | 948208      |                  |
|                       | Normalized | 6.91255775  | 0.830            | 7.0999072   | 0.664            | 6.69573707  | 0.446            | 7.2008388   | 0.423            |
| <b>Mutated</b>        |            |             |                  |             |                  |             |                  |             |                  |
|                       |            | Mean OD     | Rel.Luc.activity | Mean OD     | Rel.Luc.activity | Mean OD     | Rel.Luc.activity | Mean OD     | Rel.Luc.activity |
| Scrambled             | Firefly    | 4776771     |                  | 7627275     |                  | 7689735     |                  | 6405466     |                  |
|                       | Renilla    | 770805      |                  | 1119180     |                  | 991643      |                  | 834751      |                  |
|                       | Normalized | 6.19711989  | 1.000            | 6.8150566   | 1.000            | 7.75453969  | 1.000            | 7.673505    | 1.000            |
| miR-322-5p mimic      | Firefly    | 5878430     |                  | 4574449     |                  | 4253986     |                  | 4996001     |                  |
|                       | Renilla    | 845130      |                  | 746848      |                  | 669455      |                  | 678237      |                  |
|                       | Normalized | 6.95565179  | 1.122            | 6.1250067   | 0.899            | 6.35440171  | 0.819            | 7.3661581   | 0.960            |
| miR-503-5p mimic      | Firefly    | 6442415     |                  | 6644299     |                  | 7215024     |                  | 4281428     |                  |
|                       | Renilla    | 1148986     |                  | 1059504     |                  | 1151606     |                  | 694811      |                  |
|                       | Normalized | 5.60704395  | 0.905            | 6.271141    | 0.920            | 6.26518445  | 0.808            | 6.1620038   | 0.803            |
| miR-542-5p mimic      | Firefly    | 6113826     |                  | 3531484     |                  | 6974800     |                  | 6781499     |                  |
|                       | Renilla    | 883756      |                  | 579851      |                  | 966786      |                  | 1001376     |                  |
|                       | Normalized | 6.91800225  | 1.116            | 6.0903301   | 0.894            | 7.21441974  | 0.930            | 6.7721805   | 0.883            |

H.

Source data Figure 5

| Replicate 1       |       |         |       |         |             |                   |                               | Replicate 3 |       |         |       |         |             |                   |                               |
|-------------------|-------|---------|-------|---------|-------------|-------------------|-------------------------------|-------------|-------|---------|-------|---------|-------------|-------------------|-------------------------------|
|                   | Cdx2  | Ct mean | Rpl7  | Ct mean | $\Delta$ Ct | $\Delta\Delta$ Ct | RQ ( $2^{-\Delta\Delta Ct}$ ) |             | Cdx2  | Ct mean | Rpl7  | Ct mean | $\Delta$ Ct | $\Delta\Delta$ Ct | RQ ( $2^{-\Delta\Delta Ct}$ ) |
| Scrambled         | 21.86 | 21.88   | 14.72 | 14.83   | 7.05        | 0.00              | 1.00                          |             | 22.83 | 22.74   | 15.98 | 15.98   | 6.77        | 0.00              | 1.00                          |
|                   | 21.92 |         | 14.9  |         |             |                   |                               |             | 15.51 |         |       |         |             |                   |                               |
|                   | 21.86 |         | 14.87 |         |             |                   |                               |             | 15.91 |         |       |         |             |                   |                               |
|                   |       |         |       |         |             |                   |                               |             | 16.04 |         |       |         |             |                   |                               |
| miR-322 mimic     | 24.69 | 24.53   | 14.55 | 14.57   | 9.95        | 2.90              | 0.13                          |             | 26.02 | 26.21   | 16.12 | 16.02   | 10.20       | 3.43              | 0.09                          |
|                   | 24.69 |         | 14.48 |         |             |                   |                               |             | 16.01 |         |       |         |             |                   |                               |
|                   | 24.2  |         | 14.69 |         |             |                   |                               |             | 15.92 |         |       |         |             |                   |                               |
| miR-322 inhibitor | 21.63 | 21.69   | 14.92 | 14.80   | 6.89        | -0.16             | 1.12                          |             | 22.47 | 22.44   | 15.97 | 15.97   | 6.47        | -0.30             | 1.23                          |
|                   | 21.8  |         | 14.88 |         |             |                   |                               |             | 15.99 |         |       |         |             |                   |                               |
|                   | 21.64 |         | 14.61 |         |             |                   |                               |             | 15.95 |         |       |         |             |                   |                               |
| miR-503 mimic     | 24.72 | 24.83   | 14.94 | 14.93   | 9.90        | 2.85              | 0.14                          |             | 25.02 | 24.91   | 15.74 | 15.71   | 9.20        | 2.43              | 0.19                          |
|                   | 24.7  |         | 14.94 |         |             |                   |                               |             | 15.72 |         |       |         |             |                   |                               |
|                   | 25.07 |         | 14.9  |         |             |                   |                               |             | 15.68 |         |       |         |             |                   |                               |
| miR-503 inhibitor | 21.46 | 21.34   | 14.76 | 14.89   | 6.45        | -0.60             | 1.51                          |             | 21.26 | 21.61   | 15.56 | 15.69   | 5.92        | -0.85             | 1.80                          |
|                   | 21.36 |         | 14.96 |         |             |                   |                               |             | 15.79 |         |       |         |             |                   |                               |
|                   | 21.2  |         | 14.94 |         |             |                   |                               |             | 15.72 |         |       |         |             |                   |                               |
| miR-542 mimic     | 22.34 | 22.38   | 14.75 | 14.79   | 7.58        | 0.53              | 0.69                          |             | 24.82 | 23.98   | 16.04 | 16.04   | 7.94        | 1.17              | 0.44                          |
|                   | 22.39 |         | 14.79 |         |             |                   |                               |             | 16.2  |         |       |         |             |                   |                               |
|                   | 22.4  |         | 14.84 |         |             |                   |                               |             | 15.89 |         |       |         |             |                   |                               |
| miR-542 inhibitor | 21.41 | 21.60   | 14.63 | 14.72   | 6.88        | -0.17             | 1.13                          |             | 22.9  | 22.78   | 15.29 | 15.20   | 7.58        | 0.81              | 0.57                          |
|                   | 21.42 |         | 14.85 |         |             |                   |                               |             | 15.31 |         |       |         |             |                   |                               |
|                   | 21.96 |         | 14.68 |         |             |                   |                               |             | 15    |         |       |         |             |                   |                               |
| Replicate 2       |       |         |       |         |             |                   |                               |             |       |         |       |         |             |                   |                               |
|                   | Cdx2  | Ct mean | Rpl7  | Ct mean | $\Delta$ Ct | $\Delta\Delta$ Ct | RQ ( $2^{-\Delta\Delta Ct}$ ) |             |       |         |       |         |             |                   |                               |
| Scrambled         | 22.14 | 22.27   | 15.34 | 15.38   | 6.89        | 0.00              | 1.00                          |             |       |         |       |         |             |                   |                               |
|                   | 22.34 |         | 15.42 |         |             |                   |                               |             |       |         |       |         |             |                   |                               |
|                   | 22.32 |         | 15.38 |         |             |                   |                               |             |       |         |       |         |             |                   |                               |
| miR-322 mimic     | 24.77 | 24.78   | 15.7  | 15.69   | 9.09        | 2.21              | 0.22                          |             |       |         |       |         |             |                   |                               |
|                   | 24.84 |         | 15.76 |         |             |                   |                               |             |       |         |       |         |             |                   |                               |
|                   | 24.73 |         | 15.6  |         |             |                   |                               |             |       |         |       |         |             |                   |                               |
| miR-322 inhibitor | 21.6  | 21.80   | 15.54 | 15.48   | 6.32        | -0.56             | 1.48                          |             |       |         |       |         |             |                   |                               |
|                   | 21.92 |         | 15.54 |         |             |                   |                               |             |       |         |       |         |             |                   |                               |
|                   | 21.89 |         | 15.36 |         |             |                   |                               |             |       |         |       |         |             |                   |                               |
| miR-503 mimic     | 24.98 | 25.01   | 15.33 | 15.42   | 9.59        | 2.70              | 0.15                          |             |       |         |       |         |             |                   |                               |
|                   | 25.2  |         | 15.47 |         |             |                   |                               |             |       |         |       |         |             |                   |                               |
|                   | 24.84 |         | 15.46 |         |             |                   |                               |             |       |         |       |         |             |                   |                               |
| miR-503 inhibitor | 21.62 | 21.82   | 15.37 | 15.43   | 6.39        | -0.50             | 1.41                          |             |       |         |       |         |             |                   |                               |
|                   | 21.91 |         | 15.53 |         |             |                   |                               |             |       |         |       |         |             |                   |                               |
|                   | 21.93 |         | 15.39 |         |             |                   |                               |             |       |         |       |         |             |                   |                               |
| miR-542 mimic     | 23.95 | 23.66   | 15.43 | 15.16   | 8.50        | 1.61              | 0.33                          |             |       |         |       |         |             |                   |                               |
|                   | 23.9  |         | 15.48 |         |             |                   |                               |             |       |         |       |         |             |                   |                               |
|                   | 23.12 |         | 14.56 |         |             |                   |                               |             |       |         |       |         |             |                   |                               |
| miR-542 inhibitor | 22.32 | 22.51   | 15.54 | 15.54   | 6.97        | 0.08              | 0.94                          |             |       |         |       |         |             |                   |                               |
|                   | 22.63 |         | 15.55 |         |             |                   |                               |             |       |         |       |         |             |                   |                               |
|                   | 22.57 |         | 15.52 |         |             |                   |                               |             |       |         |       |         |             |                   |                               |

I. For Figure 5I, CDX2 and RPL7

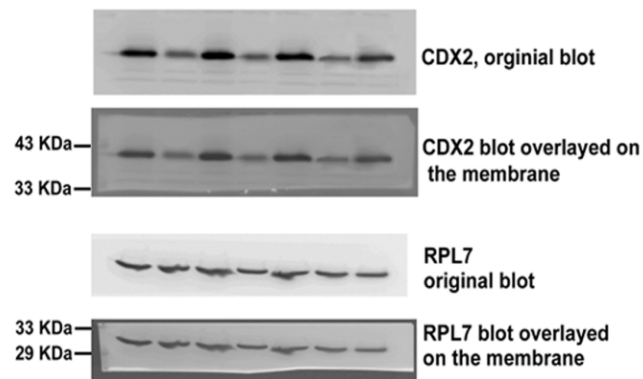

Supplement: LSA-2020-00674_SdataF5.pdf [file LSA-2020-00674_SdataF5.pdf]
