# Supplementary material for: MicroRNA regulation of murine trophoblast stem cell self-renewal and differentiation
Source: PubMed Central journal article supplement (PMC7494815; doi:10.26508/lsa.202000674), 2020-09-09
Supplement: LSA-2020-00674_SdataF1.pdf [file LSA-2020-00674_SdataF1.pdf]

C.

Source data Figure 1

| Replicate 1 |             |         |          |         |             |                   |                               |
|-------------|-------------|---------|----------|---------|-------------|-------------------|-------------------------------|
|             | miR-291a-5p | Ct mean | U6 snRNA | Ct mean | $\Delta Ct$ | $\Delta\Delta Ct$ | RQ ( $2^{-\Delta\Delta Ct}$ ) |
| TSC         | 27.97       | 27.98   | 20.79    | 20.87   | 7.11        | 0.00              | 1.00                          |
|             | 27.97       |         | 20.85    |         |             |                   |                               |
|             | 27.99       |         | 20.96    |         |             |                   |                               |
| Diff.       | 30.62       | 30.64   | 21.47    | 21.47   | 9.17        | 2.06              | 0.24                          |
|             | 30.56       |         | 21.43    |         |             |                   |                               |
|             | 30.74       |         | 21.51    |         |             |                   |                               |
| Replicate 2 |             |         |          |         |             |                   |                               |
|             | miR-291a-5p | Ct mean | U6 snRNA | Ct mean | $\Delta Ct$ | $\Delta\Delta Ct$ | RQ ( $2^{-\Delta\Delta Ct}$ ) |
| TSC         | 27.03       | 27.07   | 20.87    | 20.85   | 6.22        | 0.00              | 1.00                          |
|             | 27.07       |         | 20.89    |         |             |                   |                               |
|             | 27.12       |         | 20.79    |         |             |                   |                               |
| Diff.       | 29.36       | 29.28   | 21.52    | 21.40   | 7.88        | 1.65              | 0.32                          |
|             | 29.25       |         | 21.44    |         |             |                   |                               |
|             | 29.22       |         | 21.24    |         |             |                   |                               |
| Replicate 3 |             |         |          |         |             |                   |                               |
|             | miR-291a-5p | Ct mean | U6 snRNA | Ct mean | $\Delta Ct$ | $\Delta\Delta Ct$ | RQ ( $2^{-\Delta\Delta Ct}$ ) |
| TSC         | 27.58       | 27.66   | 21.26    | 21.27   | 6.38        | 0.00              | 1.00                          |
|             | 27.70       |         | 21.34    |         |             |                   |                               |
|             | 27.69       |         | 21.22    |         |             |                   |                               |
| Diff.       | 30.62       | 30.64   | 21.67    | 21.75   | 8.89        | 2.51              | 0.18                          |
|             | 30.56       |         | 21.88    |         |             |                   |                               |
|             | 30.74       |         | 21.69    |         |             |                   |                               |

| Replicate 1 |             |         |          |         |             |                   |                               |
|-------------|-------------|---------|----------|---------|-------------|-------------------|-------------------------------|
|             | miR-291b-3p | Ct mean | U6 snRNA | Ct mean | $\Delta Ct$ | $\Delta\Delta Ct$ | RQ ( $2^{-\Delta\Delta Ct}$ ) |
| TSC         | 27.01       | 27.11   | 20.70    | 20.74   | 6.37        | 0.00              | 1.00                          |
|             | 27.00       |         | 20.78    |         |             |                   |                               |
|             | 27.32       |         | 20.74    |         |             |                   |                               |
| Diff.       | 28.82       | 28.95   | 20.64    | 20.65   | 8.30        | 1.93              | 0.26                          |
|             | 29.04       |         | 20.68    |         |             |                   |                               |
|             | 28.98       |         | 20.62    |         |             |                   |                               |
| Replicate 2 |             |         |          |         |             |                   |                               |
|             | miR-291b-3p | Ct mean | U6 snRNA | Ct mean | $\Delta Ct$ | $\Delta\Delta Ct$ | RQ ( $2^{-\Delta\Delta Ct}$ ) |
| TSC         | 26.94       | 26.96   | 20.93    | 20.94   | 6.02        | 0.00              | 1.00                          |
|             | 26.94       |         | 20.92    |         |             |                   |                               |
|             | 26.99       |         | 20.97    |         |             |                   |                               |
| Diff.       | 29.41       | 29.38   | 21.54    | 21.53   | 7.85        | 1.83              | 0.28                          |
|             | 29.35       |         | 21.52    |         |             |                   |                               |
|             | 29.38       |         | 21.54    |         |             |                   |                               |
| Replicate 3 |             |         |          |         |             |                   |                               |
|             | miR-291b-3p | Ct mean | U6 snRNA | Ct mean | $\Delta Ct$ | $\Delta\Delta Ct$ | RQ ( $2^{-\Delta\Delta Ct}$ ) |
| TSC         | 26.88       | 26.83   | 21.46    | 21.36   | 5.47        | 0.00              | 1.00                          |
|             | 26.84       |         | 21.34    |         |             |                   |                               |
|             | 26.78       |         | 21.28    |         |             |                   |                               |
| Diff.       | 29.08       | 29.12   | 21.56    | 21.39   | 7.73        | 2.26              | 0.21                          |
|             | 29.12       |         | 21.38    |         |             |                   |                               |
|             | 29.16       |         | 21.22    |         |             |                   |                               |

| Replicate 1 |             |         |          |         |             |                   |                               |
|-------------|-------------|---------|----------|---------|-------------|-------------------|-------------------------------|
|             | miR-292a-3p | Ct mean | U6 snRNA | Ct mean | $\Delta Ct$ | $\Delta\Delta Ct$ | RQ ( $2^{-\Delta\Delta Ct}$ ) |
| TSC         | 21.87       | 21.91   | 20.96    | 20.96   | 0.96        | 0.00              | 1.00                          |
|             | 21.90       |         | 20.96    |         |             |                   |                               |
|             | 21.97       |         | 20.95    |         |             |                   |                               |
| Diff.       | 24.28       | 24.32   | 21.48    | 21.47   | 2.84        | 1.89              | 0.27                          |
|             | 24.31       |         | 21.44    |         |             |                   |                               |
|             | 24.36       |         | 21.50    |         |             |                   |                               |
| Replicate 2 |             |         |          |         |             |                   |                               |
|             | miR-292a-3p | Ct mean | U6 snRNA | Ct mean | $\Delta Ct$ | $\Delta\Delta Ct$ | RQ ( $2^{-\Delta\Delta Ct}$ ) |
| TSC         | 24.38       | 24.40   | 20.94    | 20.96   | 3.44        | 0.00              | 1.00                          |
|             | 24.32       |         | 20.98    |         |             |                   |                               |
|             | 24.50       |         | 20.96    |         |             |                   |                               |
| Diff.       | 25.62       | 25.67   | 20.74    | 20.76   | 4.91        | 1.47              | 0.36                          |
|             | 25.76       |         | 20.78    |         |             |                   |                               |
|             | 25.64       |         | 20.76    |         |             |                   |                               |
| Replicate 3 |             |         |          |         |             |                   |                               |
|             | miR-292a-3p | Ct mean | U6 snRNA | Ct mean | $\Delta Ct$ | $\Delta\Delta Ct$ | RQ ( $2^{-\Delta\Delta Ct}$ ) |
| TSC         | 22.01       | 22.02   | 21.32    | 21.35   | 0.68        | 0.00              | 1.00                          |
|             | 22.08       |         | 21.34    |         |             |                   |                               |
|             | 21.98       |         | 21.38    |         |             |                   |                               |
| Diff.       | 24.94       | 24.94   | 21.98    | 21.96   | 2.98        | 2.30              | 0.20                          |
|             | 24.97       |         | 21.99    |         |             |                   |                               |
|             | 24.92       |         | 21.92    |         |             |                   |                               |

| Replicate 1 |            |         |          |         |             |                   |                               |
|-------------|------------|---------|----------|---------|-------------|-------------------|-------------------------------|
|             | miR-294-3p | Ct mean | U6 snRNA | Ct mean | $\Delta Ct$ | $\Delta\Delta Ct$ | RQ ( $2^{-\Delta\Delta Ct}$ ) |
| TSC         | 20.91      | 20.92   | 20.95    | 20.88   | 0.04        | 0.00              | 1.00                          |
|             | 20.88      |         | 20.85    |         |             |                   |                               |
|             | 20.97      |         | 20.85    |         |             |                   |                               |
| Diff.       | 23.00      | 23.00   | 20.06    | 20.10   | 2.90        | 2.86              | 0.14                          |
|             | 22.99      |         | 20.07    |         |             |                   |                               |
|             | 23.02      |         | 20.18    |         |             |                   |                               |
| Replicate 2 |            |         |          |         |             |                   |                               |
|             | miR-294-3p | Ct mean | U6 snRNA | Ct mean | $\Delta Ct$ | $\Delta\Delta Ct$ | RQ ( $2^{-\Delta\Delta Ct}$ ) |
| TSC         | 20.78      | 20.79   | 20.98    | 20.96   | -0.17       | 0.00              | 1.00                          |
|             | 20.82      |         | 20.92    |         |             |                   |                               |
|             | 20.78      |         | 20.98    |         |             |                   |                               |
| Diff.       | 22.12      | 22.33   | 20.16    | 20.14   | 2.19        | 2.36              | 0.19                          |
|             | 22.16      |         | 20.12    |         |             |                   |                               |
|             | 22.72      |         | 20.14    |         |             |                   |                               |
| Replicate 3 |            |         |          |         |             |                   |                               |
|             | miR-294-3p | Ct mean | U6 snRNA | Ct mean | $\Delta Ct$ | $\Delta\Delta Ct$ | RQ ( $2^{-\Delta\Delta Ct}$ ) |
| TSC         | 21.11      | 21.15   | 20.76    | 20.76   | 0.39        | 0.00              | 1.00                          |
|             | 21.08      |         | 20.77    |         |             |                   |                               |
|             | 21.25      |         | 20.74    |         |             |                   |                               |
| Diff.       | 24.34      | 24.37   | 20.96    | 20.93   | 3.45        | 3.06              | 0.12                          |
|             | 24.36      |         | 20.90    |         |             |                   |                               |
|             | 24.42      |         | 20.92    |         |             |                   |                               |

| Replicate 1 |            |         |          |         |             |                   |                               |
|-------------|------------|---------|----------|---------|-------------|-------------------|-------------------------------|
|             | miR-295-3p | Ct mean | U6 snRNA | Ct mean | $\Delta Ct$ | $\Delta\Delta Ct$ | RQ ( $2^{-\Delta\Delta Ct}$ ) |
| TSC         | 21.97      | 21.95   | 21.44    | 21.41   | 0.54        | 0.00              | 1.00                          |
|             | 21.96      |         | 21.38    |         |             |                   |                               |
|             | 21.93      |         | 21.41    |         |             |                   |                               |
| Diff.       | 25.11      | 25.14   | 21.82    | 21.86   | 3.28        | 2.74              | 0.15                          |
|             | 25.07      |         | 21.84    |         |             |                   |                               |
|             | 25.25      |         | 21.92    |         |             |                   |                               |
| Replicate 2 |            |         |          |         |             |                   |                               |
|             | miR-295-3p | Ct mean | U6 snRNA | Ct mean | $\Delta Ct$ | $\Delta\Delta Ct$ | RQ ( $2^{-\Delta\Delta Ct}$ ) |
| TSC         | 21.46      | 21.52   | 20.97    | 20.89   | 0.63        | 0.00              | 1.00                          |
|             | 21.53      |         | 20.84    |         |             |                   |                               |
|             | 21.57      |         | 20.86    |         |             |                   |                               |
| Diff.       | 23.92      | 23.95   | 20.99    | 20.99   | 2.96        | 2.33              | 0.20                          |
|             | 23.96      |         | 20.95    |         |             |                   |                               |
|             | 23.98      |         | 21.03    |         |             |                   |                               |
| Replicate 3 |            |         |          |         |             |                   |                               |
|             | miR-295-3p | Ct mean | U6 snRNA | Ct mean | $\Delta Ct$ | $\Delta\Delta Ct$ | RQ ( $2^{-\Delta\Delta Ct}$ ) |
| TSC         | 21.01      | 21.02   | 20.98    | 21.00   | 0.03        | 0.00              | 1.00                          |
|             | 21.08      |         | 21.02    |         |             |                   |                               |
|             | 20.98      |         | 20.99    |         |             |                   |                               |
| Diff.       | 23.34      | 23.46   | 21.22    | 21.25   | 2.21        | 2.19              | 0.22                          |
|             | 23.57      |         | 21.26    |         |             |                   |                               |
|             | 23.48      |         | 21.27    |         |             |                   |                               |

D.

Source data Figure 1

| Replicate 1 |                         |         |                         |         |             |                   |                             |
|-------------|-------------------------|---------|-------------------------|---------|-------------|-------------------|-----------------------------|
|             | miR-322-5p              | Ct mean | U6 snRNA                | Ct mean | $\Delta Ct$ | $\Delta\Delta Ct$ | $RQ (2^{-\Delta\Delta Ct})$ |
| TSC         | 22.44<br>22.43<br>22.54 | 22.47   | 20.83<br>20.89<br>20.95 | 20.89   | 1.58        | 0.00              | 1.00                        |
| Diff.       | 17.97<br>17.91<br>17.98 | 17.95   | 20.61<br>20.63<br>20.74 | 20.66   | -2.71       | -4.29             | 19.52                       |

  

| Replicate 2 |                         |         |                         |         |             |                   |                             |
|-------------|-------------------------|---------|-------------------------|---------|-------------|-------------------|-----------------------------|
|             | miR-322-5p              | Ct mean | U6 snRNA                | Ct mean | $\Delta Ct$ | $\Delta\Delta Ct$ | $RQ (2^{-\Delta\Delta Ct})$ |
| TSC         | 22.56<br>22.53<br>22.58 | 22.56   | 20.87<br>20.94<br>20.86 | 20.89   | 1.67        | 0.00              | 1.00                        |
| Diff.       | 18.12<br>18.17<br>18.21 | 18.17   | 20.69<br>20.65<br>20.89 | 20.74   | -2.58       | -4.24             | 18.94                       |

  

| Replicate 3 |                         |         |                         |         |             |                   |                             |
|-------------|-------------------------|---------|-------------------------|---------|-------------|-------------------|-----------------------------|
|             | miR-322-5p              | Ct mean | U6 snRNA                | Ct mean | $\Delta Ct$ | $\Delta\Delta Ct$ | $RQ (2^{-\Delta\Delta Ct})$ |
| TSC         | 24.32<br>24.38<br>24.44 | 24.38   | 20.98<br>20.91<br>20.94 | 20.94   | 3.44        | 0.00              | 1.00                        |
| Diff.       | 20.28<br>20.26<br>20.20 | 20.25   | 21.14<br>21.18<br>21.18 | 21.17   | -0.92       | -4.36             | 20.49                       |

| Replicate 1 |                         |         |                         |         |             |                   |                             |
|-------------|-------------------------|---------|-------------------------|---------|-------------|-------------------|-----------------------------|
|             | miR-503-5p              | Ct mean | U6 snRNA                | Ct mean | $\Delta Ct$ | $\Delta\Delta Ct$ | $RQ (2^{-\Delta\Delta Ct})$ |
| TSC         | 29.3<br>29.42<br>29.41  | 29.38   | 21.98<br>21.93<br>21.99 | 21.97   | 7.41        | 0.00              | 1.00                        |
| Diff.       | 24.92<br>24.96<br>24.98 | 24.95   | 20.6<br>20.71<br>20.75  | 20.69   | 4.27        | -3.14             | 8.84                        |

  

| Replicate 2 |                         |         |                         |         |             |                   |                             |
|-------------|-------------------------|---------|-------------------------|---------|-------------|-------------------|-----------------------------|
|             | miR-503-5p              | Ct mean | U6 snRNA                | Ct mean | $\Delta Ct$ | $\Delta\Delta Ct$ | $RQ (2^{-\Delta\Delta Ct})$ |
| TSC         | 29.78<br>29.86<br>29.85 | 29.83   | 21.76<br>21.88<br>22.20 | 21.95   | 7.88        | 0.00              | 1.00                        |
| Diff.       | 25.44<br>25.44<br>25.42 | 25.43   | 20.95<br>20.91<br>20.99 | 20.95   | 4.48        | -3.40             | 10.56                       |

  

| Replicate 3 |                         |         |                         |         |             |                   |                             |
|-------------|-------------------------|---------|-------------------------|---------|-------------|-------------------|-----------------------------|
|             | miR-503-5p              | Ct mean | U6 snRNA                | Ct mean | $\Delta Ct$ | $\Delta\Delta Ct$ | $RQ (2^{-\Delta\Delta Ct})$ |
| TSC         | 30.32<br>30.33<br>30.37 | 30.34   | 21.67<br>21.75<br>21.66 | 21.69   | 8.65        | 0.00              | 1.00                        |
| Diff.       | 27.98<br>27.94<br>27.92 | 27.95   | 21.96<br>21.97<br>21.99 | 21.97   | 5.97        | -2.67             | 6.38                        |

| Replicate 1 |                         |         |                         |         |             |                   |                             |
|-------------|-------------------------|---------|-------------------------|---------|-------------|-------------------|-----------------------------|
|             | miR-351-5p              | Ct mean | U6 snRNA                | Ct mean | $\Delta Ct$ | $\Delta\Delta Ct$ | $RQ (2^{-\Delta\Delta Ct})$ |
| TSC         | 27.42<br>27.44<br>27.49 | 27.45   | 20.56<br>20.36<br>20.38 | 20.43   | 7.02        | 0.00              | 1.00                        |
| Diff.       | 24.92<br>24.96<br>24.98 | 24.95   | 20.6<br>20.71<br>20.75  | 20.69   | 4.27        | -2.75             | 6.73                        |

  

| Replicate 2 |                         |         |                         |         |             |                   |                             |
|-------------|-------------------------|---------|-------------------------|---------|-------------|-------------------|-----------------------------|
|             | miR-351-5p              | Ct mean | U6 snRNA                | Ct mean | $\Delta Ct$ | $\Delta\Delta Ct$ | $RQ (2^{-\Delta\Delta Ct})$ |
| TSC         | 28.22<br>28.29<br>28.26 | 28.26   | 21.97<br>21.92<br>21.98 | 21.96   | 6.30        | 0.00              | 1.00                        |
| Diff.       | 25.24<br>25.44<br>25.22 | 25.30   | 20.85<br>20.82<br>20.89 | 20.85   | 4.45        | -1.85             | 3.61                        |

  

| Replicate 3 |                         |         |                         |         |             |                   |                             |
|-------------|-------------------------|---------|-------------------------|---------|-------------|-------------------|-----------------------------|
|             | miR-351-5p              | Ct mean | U6 snRNA                | Ct mean | $\Delta Ct$ | $\Delta\Delta Ct$ | $RQ (2^{-\Delta\Delta Ct})$ |
| TSC         | 27.63<br>27.69<br>27.76 | 27.69   | 19.94<br>19.94<br>19.98 | 19.95   | 7.74        | 0.00              | 1.00                        |
| Diff.       | 25.95<br>25.95<br>25.97 | 25.96   | 20.65<br>20.66<br>20.69 | 20.67   | 5.29        | -2.45             | 5.46                        |

| Replicate 1 |                         |         |                         |         |             |                   |                             |
|-------------|-------------------------|---------|-------------------------|---------|-------------|-------------------|-----------------------------|
|             | miR-542-3p              | Ct mean | U6 snRNA                | Ct mean | $\Delta Ct$ | $\Delta\Delta Ct$ | $RQ (2^{-\Delta\Delta Ct})$ |
| TSC         | 32.51<br>32.53<br>32.73 | 32.59   | 20.93<br>20.97<br>20.97 | 20.96   | 11.63       | 0.00              | 1.00                        |
| Diff.       | 29.03<br>28.97<br>29.06 | 29.02   | 21.27<br>21.29<br>21.28 | 21.28   | 7.74        | -3.89             | 14.86                       |

  

| Replicate 2 |                         |         |                         |         |             |                   |                             |
|-------------|-------------------------|---------|-------------------------|---------|-------------|-------------------|-----------------------------|
|             | miR-542-3p              | Ct mean | U6 snRNA                | Ct mean | $\Delta Ct$ | $\Delta\Delta Ct$ | $RQ (2^{-\Delta\Delta Ct})$ |
| TSC         | 33.43<br>33.78<br>34.22 | 33.81   | 21.77<br>21.72<br>21.74 | 21.74   | 12.07       | 0.00              | 1.00                        |
| Diff.       | 28.76<br>28.65<br>28.63 | 28.68   | 20.65<br>20.62<br>20.49 | 20.59   | 8.09        | -3.97             | 15.71                       |

  

| Replicate 3 |                         |         |                         |         |             |                   |                             |
|-------------|-------------------------|---------|-------------------------|---------|-------------|-------------------|-----------------------------|
|             | miR-542-3p              | Ct mean | U6 snRNA                | Ct mean | $\Delta Ct$ | $\Delta\Delta Ct$ | $RQ (2^{-\Delta\Delta Ct})$ |
| TSC         | 32.76<br>32.87<br>32.98 | 32.87   | 20.55<br>20.73<br>20.74 | 20.67   | 12.20       | 0.00              | 1.00                        |
| Diff.       | 29.12<br>29.35<br>29.34 | 29.27   | 20.82<br>20.99<br>20.92 | 20.91   | 8.36        | -3.84             | 14.29                       |

| Replicate 1 |                         |         |                         |         |             |                   |                             |
|-------------|-------------------------|---------|-------------------------|---------|-------------|-------------------|-----------------------------|
|             | miR-450b-5p             | Ct mean | U6 snRNA                | Ct mean | $\Delta Ct$ | $\Delta\Delta Ct$ | $RQ (2^{-\Delta\Delta Ct})$ |
| TSC         | 35.95<br>35.16<br>35.41 | 35.51   | 17.99<br>17.92<br>18.08 | 18.00   | 17.51       | 0.00              | 1.00                        |
| Diff.       | 31.57<br>31.59<br>31.55 | 31.57   | 18.29<br>18.23<br>18.35 | 18.29   | 13.28       | -4.23             | 18.77                       |

  

| Replicate 2 |                         |         |                         |         |             |                   |                             |
|-------------|-------------------------|---------|-------------------------|---------|-------------|-------------------|-----------------------------|
|             | miR-450b-5p             | Ct mean | U6 snRNA                | Ct mean | $\Delta Ct$ | $\Delta\Delta Ct$ | $RQ (2^{-\Delta\Delta Ct})$ |
| TSC         | 37.07<br>36.86<br>36.53 | 36.82   | 20.34<br>20.44<br>20.47 | 20.42   | 16.40       | 0.00              | 1.00                        |
| Diff.       | 31.44<br>31.64<br>31.42 | 31.50   | 19.59<br>19.54<br>19.62 | 19.58   | 11.92       | -4.49             | 22.42                       |

  

| Replicate 3 |                         |         |                         |         |             |                   |                             |
|-------------|-------------------------|---------|-------------------------|---------|-------------|-------------------|-----------------------------|
|             | miR-450b-5p             | Ct mean | U6 snRNA                | Ct mean | $\Delta Ct$ | $\Delta\Delta Ct$ | $RQ (2^{-\Delta\Delta Ct})$ |
| TSC         | 31.56<br>32.17<br>32.23 | 31.99   | 20.45<br>20.54<br>20.66 | 20.55   | 11.44       | 0.00              | 1.00                        |
| Diff.       | 28.87<br>27.83<br>27.99 | 28.23   | 20.78<br>20.82<br>20.72 | 20.77   | 7.46        | -3.98             | 15.78                       |
